1 **Manuscript type:** Research Article

2 Title: The developmental gene *disco* regulates diel-niche evolution in adult moths

3 **Authors:** Yash Sondhi<sup>1,2</sup> (ORCID:0000-0002-7704-3944), Rebeccah L. Messcher<sup>2</sup>, Anthony J.

4 Bellantuano<sup>1</sup>, Caroline G. Storer<sup>2</sup>, Scott D. Cinel<sup>2</sup>, R. Keating Godfrey<sup>2</sup>, Deborah Glass<sup>4</sup>, Ryan A. St

5 Laurent<sup>2,6</sup>, Chris A. Hamilton<sup>5</sup>, Chandra Earl<sup>7</sup>, Colin J. Brislaw<sup>2</sup>, Ian J. Kitching<sup>4</sup>, Seth M. Bybee<sup>3</sup>, Jamie

6 C. Theobald<sup>1</sup>, Akito Y. Kawahara<sup>2</sup>

7

8 **Author Affiliation:**

9 <sup>1</sup>Department of Biology, Florida International University, Miami FL 33174 USA

10 <sup>2</sup>McGuire Center for Lepidoptera and Biodiversity, Florida Museum of Natural History, University of  
11 Florida, Gainesville, FL 32611 USA

12 <sup>3</sup>Department of Biology, Monte L. Bean Museum, Brigham Young University, 4102 Life Science  
13 Building, Provo, UT 84602, USA

14 <sup>4</sup>Natural History Museum, Cromwell Road, London SW7 5BD, UK.

15 <sup>5</sup>Department of Entomology, Plant Pathology & Nematology, University of Idaho, Moscow, ID 83844,  
16 USA

17 <sup>6</sup>Department of Entomology, Smithsonian Institution, National Museum of Natural History,  
18 Washington, D.C., U.S.A

19 <sup>7</sup>Bernice P. Bishop Museum, Honolulu, HI 96817, USA

20

21 **Corresponding author:** Yash Sondhi, [yashsondhi@gmail.com](mailto:yashsondhi@gmail.com)

22

23 **Keywords:** circadian; development, diel-niche; gene expression; insects; Lepidoptera; light cycle; RNA-  
24 seq transcriptome, transcription factor

25

26 **Significance:** Insects have been longstanding models for understanding circadian and sensory  
27 biology. The diversity of diel-activity patterns of insects is tremendous, yet our understanding of the  
28 genetic and evolutionary processes leading to this diversity is limited. Light environment is a  
29 powerful circadian entrainer that drives diel-niche and sensory evolution. To investigate the  
30 evolutionary impact of highly shifted light environments on animals with otherwise similar  
31 ecologies, we compared gene expression in closely related day- and night-active wild silkmoths.

32 Genes linked to eye development, neural plasticity and energy cellular maintenance showed  
33 expression patterns linked to diel activity. Notably, *disco*, a gene encoding a zinc finger transcription  
34 factor involved in fly (*Drosophila melanogaster*) optic lobe and antennal development in the pupa,  
35 shows robust adult circadian mRNA cycling in moth heads, is highly conserved in moths, and has  
36 additional zinc-finger domains with specific nocturnal and diurnal mutations. We hypothesize that  
37 *disco* may contribute to diversification of adult diel-activity patterns in moths.

38

39

#### 40 **Abstract:**

41 Circadian rhythms drive many biological patterns, such as activity periods. The temporal partitioning  
42 that results can reduce predation, minimize competition, or enable new resource utilization. It can  
43 also drive the evolution of sensory systems, such as the highly specialized antennae with which male  
44 moths find mates, and the visual specializations with which butterflies escape from birds. However,  
45 the mechanisms that underlie such niche-shift adaptations are poorly understood. Many model  
46 organisms in circadian biology are too distantly related from one another to elucidate the genetic  
47 drivers of diel-niche transitions. To address this, we examined gene expression patterns between two  
48 closely related wild silk moth species (Saturniidae), that utilize similar host plants and habitats, but  
49 have undergone temporal niche divergence. We found 200-700 differentially expressed genes,  
50 including day upregulation in eye development and visual processing genes, and night upregulation  
51 of antennal and olfactory brain development genes. We also found clusters of circadian, sensory, and  
52 brain development genes co-expressing with diel-activity. Eight genes showed a clear and  
53 statistically significant correlation between expression and diel activity in both species, and were  
54 involved in vision, olfaction, brain development, neural plasticity, energy utilization, and cellular  
55 maintenance. Disconnected (*disco*), a zinc-finger transcription factor involved in antennal  
56 development, circadian activity, and optic lobe brain development in flies, was repeatedly  
57 recovered in multiple analyses. While *disco* mutants have circadian arrhythmia, most studies  
58 have attributed this to improper clock neuron development, and not directly to adult circadian  
59 maintenance. Comparing predicted 3D protein structure across moth (*Bombyx mori*) and fly  
60 (*Drosophila melanogaster*) genetic models revealed *disco* has likely retained its developmental  
61 function with a conserved zinc finger domain, but it has also likely gained novel functional zinc

62 finger domains, highly conserved in moths, but absent in *D. melanogaster*. These regions had  
63 several mutations between nocturnal and diurnal study species that co-occur with higher levels of  
64 predicted phosphorylation sites. Together, robust circadian gene expression, functional nocturnal  
65 and diurnal mutations with high phosphorylation, structural and sequence conservation, leads us to  
66 hypothesize that *disco* may be a master regulator contributing to the diversification of adult diel-  
67 activity patterns in adult moths.

68

## 69 **Introduction**

70 Circadian rhythms regulate many biological processes, including day-night activity patterns.  
71 Research to date has explored genes, circuits, and environmental cues mostly in the context of  
72 control within a single organism (1, 2). Diel-niche stems from the concept of temporal partitioning of  
73 activity periods, driven by the variation in resources, temperature, light level, or predation, across the  
74 day (3–6). Periods are often binned into three distinct groups: diurnal (day active), nocturnal (night  
75 active), or crepuscular (active at dusk, dawn, or both), and although this is useful for comparative  
76 analysis, it is often an overgeneralization (7–11), and the evolution of diverse diel-niches across  
77 organisms (7, 11–15) is poorly understood (16–19).

78 Several studies have documented sensory adaptation accompanying evolutionary diel-niche  
79 transitions in mammals, birds, and insects (8, 18, 20, 21). Specific examples include colour vision  
80 gene expansions in diurnal moths (22, 23), improved olfactory senses in dark-bred flies (24), and the  
81 evolution of hearing organs in nocturnal butterflies (25). Comparisons of circadian genes across  
82 model organisms catalogue variation at long evolutionary timescales and highlight conserved  
83 elements (26, 27), but diel switches can occur over short timescales (28), and distantly related species  
84 provide less insight into mechanisms that enable faster switches. Moths and butterflies (Lepidoptera)  
85 are an ideal group to address this, as their evolutionary history is well known and there are many  
86 diel-niche switches, often between closely related species (7, 29). They are also one of the few insect  
87 groups, outside of *Drosophila*, in which both sensory and circadian genes have been characterized  
88 (23, 30–35).

89 Wild silk moths (Saturniidae) are important models for understanding chronobiology, with  
90 seminal experiments confirming the brain functions as the primary circadian control (36, 37). While  
91 most are nocturnal, many fly during the day, and temporal niche switches may function as a

92 mechanism for reproductive isolation in sympatric species (38, 39). Saturniid phylogeny is relatively  
93 well known, and there are several annotated genomes, chromosomal maps. Furthermore, they belong  
94 to the superfamily Bombycoidea, which includes the domesticated silk moth, *Bombyx mori*, a key  
95 biological model organism serving as a reference taxon for comparative genomic studies (32, 40–43).  
96 Saturniids such as *Antheraea* are of major importance to the silk industry, and they have a well-  
97 resolved taxonomy and well-documented life histories (38, 44–46). Despite this, the genetic elements  
98 that control day-night activity and diel-niche evolution, in this group and insects in general, remain  
99 largely unknown (28, 37).

100 We used RNA-Seq to characterize expression patterns during peaks and troughs (midday and  
101 midnight) across two closely related wild silkmoths: the diurnal *Anisota pellucida*, and nocturnal  
102 *Dryocampa rubicunda*. They are sister genera, feeding on large deciduous trees in the temperate  
103 forests in Eastern North America, with a recent divergence in temporal niche ~3.8 Mya (47). We  
104 sequenced head tissue at different time periods to identify expression in sensory, circadian, and  
105 neural genes that correlate with diel activity. Expression in eight genes clearly and significantly  
106 correlates with diel activity, with functions in vision, olfaction, brain development, neural plasticity,  
107 energy utilization, and cellular maintenance. Of these, a single gene emerges consistently across  
108 analyses: *disco*, which encodes a zinc-finger transcription factor. In moths, it has likely retained  
109 functions also found in flies (eye and brain development during the pupal stage) through a conserved  
110 zinc finger domain. But it has also gained an extra zinc-finger domain, surrounded by phosphorylated  
111 sites and with mutations in both nocturnal and diurnal species, which may contribute to adult moth  
112 circadian regulation.

113

## 114 **Results**

115 We compared gene expression across two wild silk moth species, *Anisota pellucida* and *Dryocampa*  
116 *rubicunda*, whose males are diurnal and nocturnal, respectively (Fig. 1, Table 1). We generated head  
117 (eyes, brain) transcriptomes from moths collected and flash frozen at midday and midnight, referred  
118 to as ‘day’ and ‘night’ hereafter. Using multiple programs to assemble high-quality *de novo*  
119 assemblies (Table 2), we characterized the level of gene (mRNA) expression with quasi-read  
120 mapping, which can be used to correlate protein expression (48).

121

122 ***Day-night gene expression patterns switch between nocturnal and diurnal species***

123 We found 350 & 393 significantly differentially expressed genes (DEGs) when comparing day and  
124 night treatments for each species (Table 3, Fig. 2A). *Anisota* had more day-upregulated genes (56%)  
125 and *Dryocampa* was slightly more night-upregulated (53%). In order to compare DEG sets between  
126 species, we mapped our DEGs to *Bombyx mori* orthologs using the Orthofinder software (49)  
127 (Supplementary Data 1). Approximately 60% of DEGs from each species had identifiable orthologs  
128 in *B. mori* (Table 3), and only a small number of DEGs (6-8 genes) overlapped between both species  
129 (Fig. 2B). We also replicated this analysis using other software to assure that our results were robust,  
130 despite different normalization methods (50). With DESeq2, we found 498 & 697 DEGs (Fig. 2C,  
131 Table 3, Supplementary Data 2), with similar *Bombyx* annotation rates (61%), although the  
132 proportion of day upregulated genes increased considerably in the *Anisota* (79%) compared to being  
133 more even split in *Dryocampa* (50%) (Table 3). The total number of overlapping genes increased  
134 (19-26, Fig. 2D) when using DESeq2. A comparison of the two methods revealed that 174 and 216  
135 genes were shared between *Anisota* and *Dryocampa*, respectively.

136

137 ***Divergently expressed genes are linked to brain optic lobe, antennal and neural development***

138 To identify important regulators involved in diel-niche evolution, we applied two filtering criteria to  
139 our gene expression data. First, we selected genes that exhibited highly significant differential  
140 expression in both species. Second, we focused on genes that displayed upregulation patterns  
141 consistent with the natural diel-activity of each species. Our rationale was that this subset of genes  
142 was more likely to contain key regulators. To compare DEG overlap between the two species, we  
143 grouped the transcripts to their matching orthologs from *Bombyx mori*; if two transcripts from  
144 different species mapped to the same ortholog, we treated them as being the same. This allowed us to  
145 examine overlapping genes between the species to see if any genes switched fold-change sign from  
146 positive to negative or vice versa. (Fig. 2, Supplementary Data 3). We found 51 overlapping DEG  
147 transcripts that mapped to 28 unique *Bombyx* genes. Nine genes showed flipped patterns of  
148 expression between the two species, and eight of them coincided with known diel activity patterns  
149 (Table 7). Examining gene ontology (GO) annotations and comparing orthologs from flybase  
150 (<https://flybase.org/>), we found genes linked to optic lobe and antennal development (*disco*),

151 locomotion and energy use (*SLC2A6*, *SLC17A5*), brain and neural development (*TUBG1*) and other  
152 essential biological processes like transcription, ribosomal translation, protein processing,  
153 mitochondrial maintenance (*RpS4*, *PARL*, *Mrps5*) and wound response (*PRP2*) (Table 7, Fig. 2B, D).  
154 Of these, only *disco* was recovered with both methods.

155

#### 156 ***Gene network analysis identifies diel activity and species-specific co-expressed clusters***

157 Identifying highly expressed genes helps understand which genes are activated during particular  
158 biological processes. However, determining only those that are highly expressed can often overlook  
159 genes with important biological functions (51). We examined co-expressed genes that may be  
160 correlated with diel-niche or RNA collection time. We used WGCNA, a weighted correlation  
161 network analysis tool to cluster genes together based on their normalized counts (52). After  
162 examining co-expression patterns for each species separately, we found two modules in each species  
163 that clustered with day-night treatment (cluster-*grey60* and cluster-*tan*) (Fig. S6, Supplementary data  
164 4). Since we were interested in species-specific differences, we reran analyses and combined reads  
165 from *Anisota* and *Dryocampa*, using only normalized counts for genes that had valid *Bombyx*  
166 annotations for both species. This approach narrowed our focus to 2000 genes. Among these, we  
167 discovered two clusters (cluster-blue and cluster-turquoise) consisting of 50 genes each that exhibited  
168 different expression patterns across species (Fig. 4).

169

#### 170 ***GO enrichment of photoperiodism, circadian control, muscle and neural growth genes***

171 We used a gene enrichment analysis to determine if gene ontology (GO) terms were significantly  
172 overrepresented in the DEG and WGCNA sets compared to the appropriate background of GO terms.  
173 Using TopGo, which allows custom gene sets, we found an overrepresentation of genes involved in  
174 several biological functions (Supplementary Table 1). Those that seemed significant for diel-niche  
175 and vision were ‘response to stimulus’ and ‘smooth muscle control’, as well as folic acid serine,  
176 glycine and retinoic acid metabolism. We also used ShinyGo to examine WGCNA clusters  
177 (Supplementary Data 5). We matched orthologous genes in the less duplicated, filtered  
178 transcriptomes to obtain identifications of the most related *Bombyx* genes (Table 4). We examined  
179 the enrichment of both tan and grey60 modules, listing the non-redundant terms using ReviGo (Fig.  
180 S7, Supplementary Table 2, 3). Gene clusters that co-expressed in the same direction together in the

181 day and night treatments of both species included photoperiodism, circadian control, negative  
182 phototaxis and nervous system development. We next checked for the enrichment of the modules that  
183 showed species-specific patterns (blue and turquoise, Fig. S8, Supplementary Table 2). These  
184 included genes involved in muscle proliferation and nerve growth, neural signaling, glycolysis,  
185 oxidative stress response, and basic cellular functioning such as protein processing and  
186 transcriptional regulation.

### 187 ***Day upregulation of vision genes in the diurnal moth***

188 Since both EdgeR and DESeq2 analyses use different normalization methods and statistical model  
189 assumptions (50, 53), we repeated enrichment analyses by combining datasets and examining genes  
190 that appeared in both analyses. For the *Anisota*, we tested over-enrichment of a smaller subset ( $FC \leq$   
191  $-5$ ) of diurnally highly upregulated genes (Fig. 3, Table 5). We found gene enrichment for visual  
192 perception, excretion regulation, negative gravitaxis, synaptic plasticity, along with genes associated  
193 with other biological processes, such as RNA interference, endopeptidase activity and endocytosis. A  
194 reduction in stringency ( $FC \leq -2$ ) did not alter results considerably (Fig. S4). Night-upregulated  
195 genes ( $FC \geq 2$ ) included ocellar pigment genes, eye-photoreceptor cell development, snRNA  
196 processing, post embryonic development and neurotransmitter secretion, among a host of other  
197 processes that may be required for growth, development and metabolism (wnt signaling,  
198 tricarboxylic acid cycle, and cellular response to insulin, glucose transport) (Fig. S4).

199

### 200 ***Night upregulation of antennal and olfactory brain regions mushroom development genes***

201 We repeated the same analyses for *Dryocampa* and tested highly nocturnally upregulated genes ( $FC \geq 5$ ).  
202 Our results show upregulation in genes known to be associated with mushroom body development,  
203 locomotor rhythm, synaptic growth, energy utilization (Sialin transport) and mitochondrial translation  
204 (Fig. 3B, Table 6). A reduction in stringency ( $|FC| \geq 2$ ) showed entrainment of the clock cycle, and  
205 antennal development genes. Genes associated with innate immune response, DNA repair, cell division,  
206 histone acetylation, circadian rhythm, retinoid cycle were upregulated during the day, possibly indicating  
207 a period of cellular repair during a time when these moths are inactive (Fig. S5).

208

### 209 ***Key sensory, circadian, eye development and behavioral genes can drive diel-niche switches***

210 We combined results from the DEG (EdgeR and DESeq2) and gene network analyses (WGCNA) to  
211 create a cumulative list of 1700 transcripts (Supplementary Data 5, 6). Focusing on genes that were  
212 recovered across *Anisota* and *Dryocampa* reduced the set to 274 transcripts (Supplementary Data 7).  
213 Because many transcripts had poorly annotated *Bombyx* hits, we improved annotations using the  
214 program eggNog mapper (54). We tested if these genes had GO terms associated with sensory,  
215 circadian, brain and neural development, or behavioral regulatory genes (Fig. 4, Table 7,  
216 Supplementary Data 8). We found that several genes in each category had associated GO terms, with  
217 a predominance of vision and brain development genes (Supplemental Table 4).

218

### 219 ***Predicted functional regions and homology patterns identified for genes of interest***

220 We examined protein and gene evolution for a set of genes which we found were of interest based on  
221 results from DGE, WGCNA, GO annotations (Supplemental Table 5). In order to infer functional  
222 homology from structural conservation, we downloaded high quality genomes of Bombycoidea  
223 moths and relatives from Darwin Tree of Life [<https://www.darwintreeoflife.org/>] (Supplemental  
224 Table 6). We assigned a reference protein sequence for each gene of interest from the *Bombyx mori*  
225 predicted proteome. We used Orth finder to identify orthologs and filtered orthogroups containing  
226 the reference sequence (49, 55). Since we had more than one gene per species, we reduced the  
227 number down to a single gene by choosing the highest identity sequence relative to the *B. mori*  
228 reference sequence. We also modelled the 3D structure of *B. mori* proteins and mapped the  
229 evolutionary conservation onto the 3D predicted structure for proteins above a certain conservation  
230 threshold (Supplementary Data 9). These analyses predict structurally and functional conserved  
231 regions of proteins (Fig S9, Supplementary Data 10). We repeated this analysis with 38 insect  
232 genomes (Supplemental Table 7) and mapped evolutionary conservation onto 3D protein structure  
233 (Supplementary Data 9,10). We include results of evolutionary conservation analyses for two  
234 regulatory candidates (*disco* and *tk*) that showed varying levels of sequence and protein evolution  
235 between insects and moths (Fig. S10).

236

### 237 ***Modeling predicts additional functional zinc finger domains for disco in Lepidoptera***

238 *Disco* was recovered across multiple analyses. In *Drosophila melanogaster* it is known for its role in  
239 eye development, important for circadian maintenance, and for leg and antennal appendage



240 formation (56–60). To determine if *disco* was conserved between moths and *Drosophila*, we  
241 compared the primary sequence and 3D protein structure of *Drosophila* and *Bombyx mori*. In the  
242 moth, the sequence length of *disco* was nearly double that of *Drosophila* (Fig 6A). However, a region  
243 spanning over 100 amino acids was highly conserved, contained the zinc-finger domain important for  
244 its function, and showed strong 3D structural conservation (Whole protein alignment RMSD(align,  
245 super) = 37.833, 2.566, MatchAlign score (align, super) = 540 (2234 atoms), 333.1 (554 atoms) vs.  
246 alignment of conserved region RMSD=2.699,2.566, MatchAlignScore =443(671 atoms), 351 (615  
247 atoms). This indicates the DNA binding function of *disco* has likely been conserved. However, an  
248 additional ~500 amino acid region absent in *Drosophila* is highly conserved across moths, and  
249 includes several regions predicted to be functional (Fig. 6A, Fig. S10). We hypothesize that *disco* has  
250 a novel role in moths for diel-niche regulation. To further test this, we compared *disco* sequences  
251 across *Anisota* and *Dryocampa* and found 23 mutations between them, three of which mapped to the  
252 predicted functional region (Fig. 6B, Supplementary Data 10). InterProScan predicted four zinc  
253 finger domains, three in this region, although the CATH-Gene3D databases prediction combined the  
254 two separate domains into a single predicted domain (Fig. S11). We also found many sites (53) with  
255 predicted phosphorylation potential, especially around the second zinc finger domain (18). Reducing  
256 the stringency increased the total to 142, which were still enriched around the second domain.

257

## 258 **Discussion**

259 We identified the genetic mechanisms of diel-niche switches by examining gene expression during  
260 the day and night in two closely related moth species. We used RNA-Seq to measure gene expression  
261 profiles of head tissue and isolated sensory, circadian and neural processes. We found between 300  
262 and 700 genes that significantly altered day night circadian expression patterns. The diurnal species  
263 had enriched visual perception genes during the day and the nocturnal species had locomotor and  
264 olfactory genes upregulated at night.

265 Thirty overlapping DEGs were present in both species, with some DGEs showing divergent  
266 patterns of expression matching the species' diel-niche. Examining expression data with a sensitive  
267 clustering analysis yielded over 170 genes that showed day-night or species specific co-expressed  
268 clusters. We also used GO terms to search for genes associated with sensory, neural, or circadian  
269 patterns. We found genes in each category (Supplemental Table 4) and modeled the 3D structure and

270 predicted functional regions for a subset (Supplemental Table 5). The divergently expressed gene  
271 *disconnected* (*disco*) was implicated in vision, hearing, locomotion and brain development. Given the  
272 multiple lines of evidence supporting the importance of this gene in regulating diurnal and nocturnal  
273 activity in moths, we explored the evolution of *disco* by modeling fly and moth *disco* structures. This  
274 analysis revealed novel zinc-finger conserved domains in moths, which were lacking in *Drosophila*,  
275 surrounded by phosphorylated sites. Several mutations between *Anisota* and *Dryocampa* also  
276 mapped to these regions, further strengthening evidence for its role in diel-niche shifts.

277

### 278 ***Visual and olfaction***

279 Visual systems often accompany diel and photic environment shifts (18). For example, nocturnal  
280 carpenter bees have much larger facets in their eyes than their diurnal counterparts (61). Nocturnal  
281 moths have higher photoreceptor light sensitivity and have neurons more suited to pooling than close  
282 diurnal relatives (62). Some of these trends seem to hold across the phylogeny, with diurnal species  
283 evolving more complex color visual systems, often reflected in visual opsin sequence evolution (22,  
284 23). We did not find diel-expression patterns in color vision opsins, a result corroborated by a recent  
285 study (22). However, we discovered a cerebral opsin (ceropsin) upregulated during the day. Ceropsin  
286 has been implicated in photoperiodism and is expressed in the brain (63).

287 We also found several eye development genes (*TENM2*, *ANKRD17*, *EHD4*, *JAK2*),  
288 phototransduction genes (*PPAP2*, *RDH11*), and retina homeostasis, eye-antennal disc development,  
289 and photoreceptor cell maintenance genes (*disco*, *glass*) (64). Surprisingly a few visual genes, such  
290 as *garnet* and *rugose* also appeared to have different isoforms present, showing both day and night  
291 upregulation. *Garnet* is an eye color mutant gene in flies (65) and *rugose* is implicated in retinal  
292 pattern formation (66).

293 One of the classical differences between day flying butterflies and night flying moths is that  
294 butterflies have a clubbed antennae, while moths often have a sensilla-covered antenna; likely a  
295 function of increased investment in olfactory sensing, similarly, there is also evidence for increased  
296 investment in olfactory sensing in the brain, with relatively larger mushroom bodies in nocturnal  
297 species (67, 68). In our diel gene-expression dataset, we found several olfactory genes, including  
298 those involved in odorant binding (*Obp84a*, *Obp58b*), pheromone response (*tk*), mushroom body  
299 development (*DAAM2* and *DST*) and antennal development (*disco*).

300

### 301 ***Hearing and mechanoreception***

302 Many moths have active hearing organs, and these have evolved repeatedly across Lepidoptera (69),  
303 and their use varies depending on the ecological context of the moth. Several drivers for moth  
304 hearing include sexual selection and as a defense against insectivorous bats (70). The primary  
305 nocturnal group of butterflies, Hedyliidae, has reverted to a nocturnal niche and regained hearing  
306 organs (25). Thus, although rudimentary vibrational hearing exists in some diurnal moths (71) it is  
307 significantly more developed and used at broader frequency ranges at night, when light is less  
308 available. While Saturniidae lack hearing organs (72) they may instead still have vibration  
309 mechanosensors that can be useful in evading predation similar to those in locusts and crickets (73–  
310 76). Indeed, we did find diel co-expression of several mechanosensory and ear development genes,  
311 including *PI4KB*, *KCTD15*, *unc-22*, and *RhoGAP92B* (77)

312

### 313 ***Brain and neural rewiring***

314 Finding an upregulation of neural and brain development was expected since we sequenced head  
315 transcriptomes. However, we tested gene expression two days after pupal eclosion, where  
316 presumably gross structures are already developed, so it is possible these genes we found expressed  
317 regulate adult plasticity. Adult neural plasticity has been showed in Lepidoptera and other insects  
318 (78–80), and we recovered several genes linked to axon regeneration (*APOD*), central complex  
319 development (*Ten-a*, *TENM2*, *DST*, *ALDH3A2*, *OGT*), central nervous system development (*disco*,  
320 *RpL4*), and neuropeptide hormonal activity (*tk*). Several genes were specific to retinal ganglion cell  
321 axon guidance (*TENM2*) and mushroom body development (*DAAM2*), leading us to speculate that  
322 plasticity could occur through neural wiring and plasticity are shaping sensory adaptation. Many  
323 Lepidoptera have distinct phenotypic plasticity in wing patterns and coloration in different seasons  
324 (81), and there is some evidence that they also have seasonal plasticity in their behavior and foraging  
325 preferences (82). Research has found Lepidoptera can override their innate preferences and learning  
326 preferences for new visual and olfactory cues after eclosion (83). It is possible the diel-niche and  
327 circadian rhythms too have plasticity, there are reports of some moth species like *Hyles lineata*  
328 showing relatively labile diel-niches possibly driven by temperature and resources (84–86). These

329 same mechanisms allowing flexibility within a species, might be involved in diel-niche evolution  
330 between species.

331

### 332 ***Circadian and behavioral regulators***

333 The behavioral state of an animal to engage in any activity, e.g., feeding, flight or mating, is likely a  
334 function of circadian and behavioral regulators that respond to certain stimuli. We found differential  
335 expression of genes involved in locomotion (*unc-22*, *KCTD15*, *Tk*) and circadian or rhythmic  
336 behavior (*SREBF1/SREBF2*, *OGT*, *disco*, *JAK2*) in both species. We also found several key circadian  
337 regulators like *per*, *tim* although they were downregulated only in *Dryocampa*. *Clock-like* or *takeout*  
338 another gene under circadian control, (87) was expressed in both species, although without any  
339 significant up or down regulation. *Takeout* was moderately conserved in the moths we examined, but  
340 had diverged considerably among other insects, to the point where orthology searches with  
341 Orthofinder failed to recover orthologs among insects. Even among *D. melanogaster*, its closest  
342 homologs were *Jhbp5* and *takeout* which had 21-25% sequence identity (Supplementary Data 11).  
343 Surprising, , it's 3D structure was highly conserved (RMSD (align, super) = 2.556, 2.755,  
344 MatchAlign score (align, super) = 199 , 642.937, Supplementary Data 11, Fig. S12), highlighting an  
345 interesting example of likely functional convergence despite primary sequence divergence.

346

### 347 ***Energy use and general cellular maintenance***

348 In addition to the genes mentioned above, several key divergently expressed genes were involved in  
349 energy utilization. This finding makes biological sense, as once activity is initiated, energy  
350 mobilization and upregulation of basic cellular processes need to be maintained. Two of these genes  
351 were *SLC175A/MFS10* and *SLC2A6/Tret1-1*, which encode different trehalose sugar transporters.  
352 Trehalose is an important sugar present in insect hemolymph (88). Other genes found were ribosomal  
353 (*RpL4*, *mRpS5*), golgi (*GCC*), and mitochondrial maintenance (*PARL/rho7*) along with  
354 transcriptional regulation (*Spt5*).

355

### 356 ***Disco as putative master diel-niche regulator in adult moths***

357 Many genes that we discovered likely play a critical role in maintaining sensory shifts, but in order to  
358 identify genes that might regulate upstream, we looked for genes that were: 1) expressed in both

359 species, 2) showed coincident expression patterns with respect to diel-niche, and 3) played a role in  
360 sensory and neural functioning and circadian control. Only *disconnected* (*disco*) fit these criteria.  
361 *Disco* is a key developmental and patterning gene, first discovered for its role in neural migration  
362 from the disconnected optic lobe mutant phenotype (89). This gene is now considered an appendage  
363 development gene, with a well characterized pupal role in antennal and leg distal patterning in  
364 *Drosophila melanogaster* (60). Mutants also have a disrupted circadian locomotor rhythm due to the  
365 improper formation of neurons that express clock genes (90, 91). As a gene that is involved both in  
366 optic lobe, antennal formation, and in neural wiring and circadian control, it is a very strong  
367 candidate for driving behavioral diel-niche shifts and sensory adaptations (56, 57, 92). *Disco*  
368 expression data from *B. mori* suggests strong adult head, antennal, and nucleus expression,  
369 suggesting that it still acts as a transcription factor, and can regulate other genes (40).

370 *Disco* encodes the acid zinc finger transcription factor and is approximately 500 and 1000  
371 amino acids in length in *Drosophila* and *B. mori*, respectively. Our modeling showed that a ~150  
372 amino acid region is conserved structurally at the sequence level, and this region also contains zinc-  
373 finger motifs associated with DNA binding (93). This indicates that *disco* likely has retained its DNA  
374 binding and likely pupal and appendage patterning function in moths. We predicted the functional  
375 regions of *disco* in *Bombyx* based on evolutionary conservation modelling, and found an additional  
376 500 amino acids, absent in *Drosophila*, were predicted to be functional (conserved and exposed).  
377 Domain and family level modeling predicted at least two additional zinc finger domains in this  
378 region (Fig. S10, Fig. S11). We also found many phosphorylated sites surrounding the zinc finger  
379 domains. Examining mutations between *Anisota* and *Dryocampa* revealed three mutations mapped to  
380 these predicted functional regions (Fig. 6B).

381 Given *disco*'s adult diel-specific expression in moths, additional zinc-finger DNA binding  
382 domains, and the high number of phosphorylated sites, we propose it as a candidate transcriptional  
383 regulator for diel-regulation in adult moths.

384

### 385 ***Study species and their evolution and variation in life histories***

386 *Anisota* and *Dryocampa* are closely related and ecologically similar saturniids of the subfamily  
387 Ceratocampinae, thought to have diverged ~3.81 Mya (47). They largely occupy the same range and  
388 forest habitat in the Americas, feeding on large trees (*Anisota* on oaks and *Dryocampa* on maples)

389 where population flares cause host plant defoliation (38). Because they reportedly hybridize (94), and  
390 pre- and postzygotic barriers are potentially ineffective, temporal partitioning may be important in  
391 their evolutionary history.

392

## 393 **Conclusion**

394 This study provides a framework for how diel-niche evolution in Lepidoptera can occur.  
395 Sensory and neural developmental genes appear to be key. We identify the pivotal role of the  
396 transcription factor *disco*, uncovering a second functional region with species-specific mutations in  
397 moths. Our findings provide useful targets for further genetic manipulation and highlight the insight  
398 non-model systems provide to genetics and development.

399

## 400 **Supplementary information**

401 Supplementary tables and data are available for the reviewers and will be uploaded to repository  
402 [xxxxx] on submission.

403 .

## 404 **Author contributions**

405 Y.S.: conceptualization, data curation, formal analysis, investigation, methodology, project  
406 administration, software, visualization, writing–original draft. R.M: investigation, methodology, project  
407 administration, data curation, writing - review & editing. A.J.: conceptualization, formal analysis, writing  
408 - review & editing C.S.: conceptualization, data curation, methodology, project administration,  
409 supervision. S.C.: formal analysis, software. K.G.: formal analysis, software, visualization, writing-  
410 review and editing, D.G.: investigation, project administration, data curation. R.L.: conceptualization,  
411 data curation, investigation, methodology, writing–original draft, writing -review & editing. C.H.:  
412 conceptualization, data curation, investigation, methodology, project administration, writing - review and  
413 editing I.K.: conceptualization, funding acquisition, methodology, resources, writing–review and editing.  
414 C.E.: formal analysis, software, visualization, data curation, writing- original draft, writing- review &  
415 editing. C.B.: software, validation, writing -review and editing. S.B.: funding acquisition, methodology,  
416 validation, writing–review and editing. J.T: conceptualization, funding acquisition, supervision,  
417 validation, writing–review & editing. A.K: conceptualization, methodology, resources, writing–review  
418 and editing, visualization, supervision, funding acquisition

419

## 420 **Acknowledgements**

421 We thank Jesse Breinholt, Martijn Timmermans and Andreas Zwick for help with project  
422 conceptualization. Kelly Dexter, Amanda Markee, and members of the McGuire Center for  
423 Lepidoptera and Biodiversity at the University of Florida assisted with animal care and wet-lab  
424 troubleshooting. We thank Belinda Pinto, Danielle DeLeo, Heather Bracken-Grissom, Jorge Perez-  
425 Moreno, Zhou Lei for discussions, advice and assistance with bioinformatics pipelines and wet-lab  
426 protocols. We thank Nicolas Alexandre, Sachit Daniel, Riddhi Deshmukh, David Plotkin, Chelsea  
427 Skojec and Nitin Ravikanthachari for comments and feedback on the manuscript. Janelle Nunez-  
428 Castilla, Jessica Liberles, Raghavan Venket, Yi-Ming Weng, Yu Fahong and Xiaokang Zhang  
429 assisted with troubleshooting bioinformatic pipelines and provided analytical recommendations. The  
430 authors acknowledge the University of Florida Research Computing for providing computational  
431 resources and support that have contributed to the research results reported in this publication  
432 (<http://researchcomputing.ufl.edu>). We acknowledge NBAF and UF-ICBR for assistance with  
433 sequencing and generating libraries.

434 Funding for the project was through NSF DEB-1557007, NSF PRFB-1612862, and NSF IOS-  
435 1750833 and NERC NE/P003915/1. The Florida International University Presidential fellowship  
436 supported YS.

437

## 438 **Figure Legends and Figures:**

439

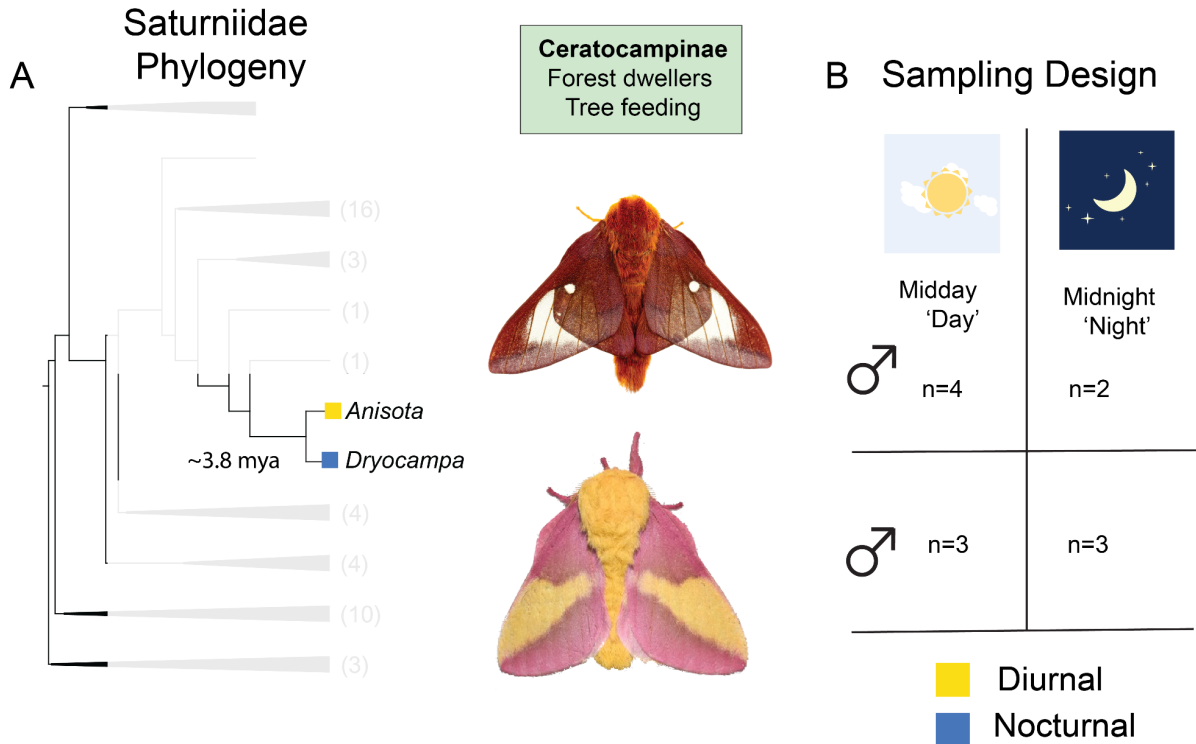

440

441 **Figure 1:** Nocturnal and diurnal moths on a phylogeny with RNA-seq sampling design.

442 (A): Collapsed phylogeny of Saturniidae, adapted to show where the two study species, diurnal

443 *Anisota pellucida* (Pink-striped oakworm moth) and nocturnal *Dryocampa rubicunda* (Rosy Maple

444 moth) sit. Faded numbers on the tip represent the number of genera in the tree before collapsing.

445 Phylogeny adapted from Rougerie et al. 2022 (B): Sampling design showing the number of replicates

446 for each species and collection period (day/night) sampled. Collection of heads was done 2-days

447 post eclosion at midday (sun) and midnight (moon) and tissue was flash frozen for RNA

448 preservation. Care was taken that the eclosed moths were exposed to a natural light cycle and red

449 lights were used when collecting the moths at night. Photo credits *Anisota pellucida* © Mike

450 Chapman; *Dryocampa rubicunda* (CC) Andy Reago and Chrissy Mclearn;

451



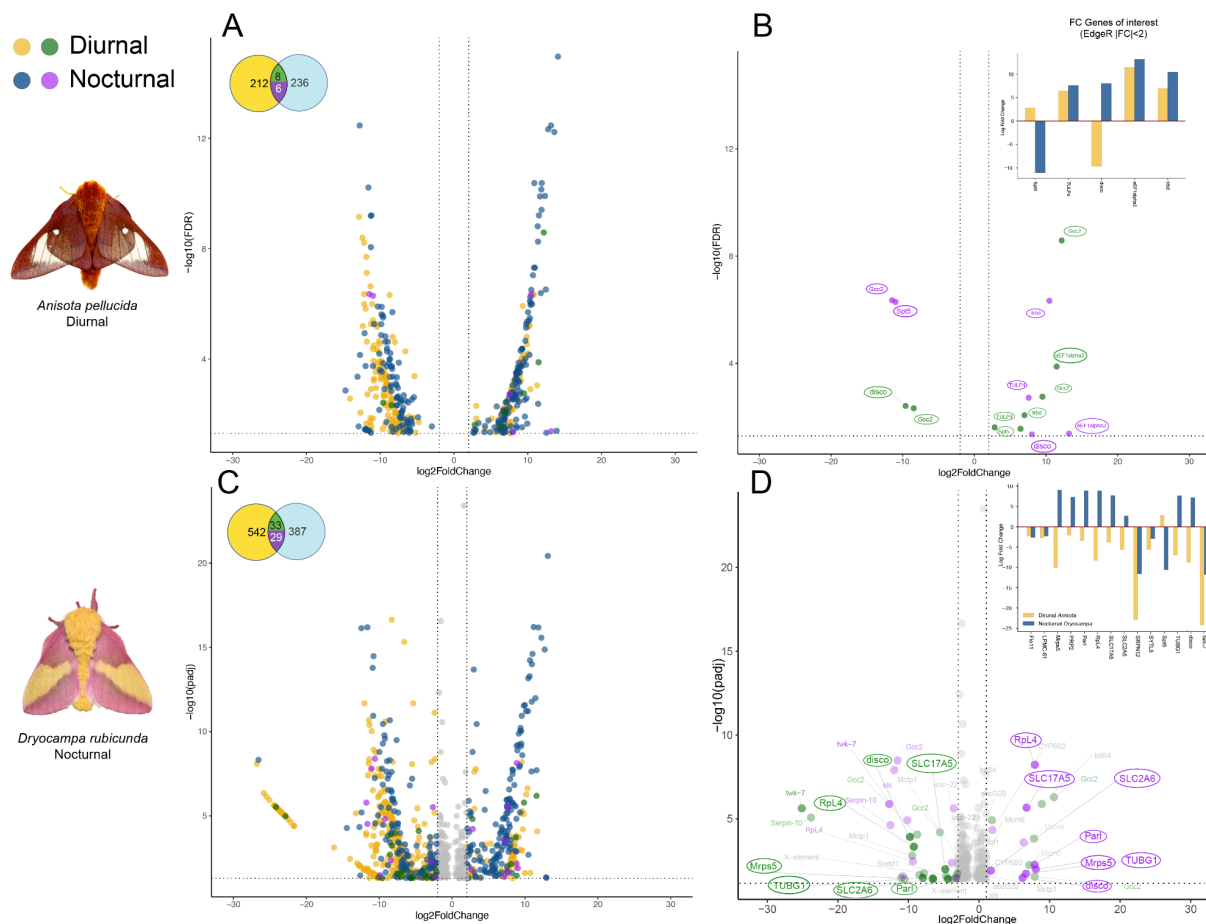

452  
 453 **Figure 2:** Nocturnal and diurnal species show divergent patterns of gene expression across two  
 454 different analyses software (EdgeR and DESeq2)  
 455 Volcano plots and Venn diagrams showing EdgeR (A-B) and DESeq2 (C-D) results across **day vs.**  
 456 **night** sampling times for both nocturnal and diurnal species. Venn diagrams represent the number of  
 457 differentially expressed genes (DEGs) across both species with the number of common DEGs across  
 458 each pair. (A/C): Volcano diagrams illustrating fold change and adjusted p-values for the significant  
 459 differentially expressed genes between midday and midnight samples. Circles in the top left represent  
 460 the number of genes expressed in both species and the colors correspond to FC values for those genes  
 461 in the volcano plots. Yellow and blue represent genes expressed only in the nocturnal or diurnal  
 462 species, green/purple indicates DEGs present in both species. (B/D): Only genes expressed in both  
 463 species are shown and genes that display opposite trends in expression are highlighted. See  
 464 Supplementary Material for a detailed list of DEGs. Positive fold change indicates night  
 465 overexpression and negative fold change indicates day overexpression. Genes had FDR or adjusted  
 466 p-value < 0.05 and FC > |2|. Identification of common genes was done using orthogroup clustering  
 467 with Orthofinder with *Bombyx mori*. Gene names and annotations were transferred from *B. mori*.

468  
469  
470

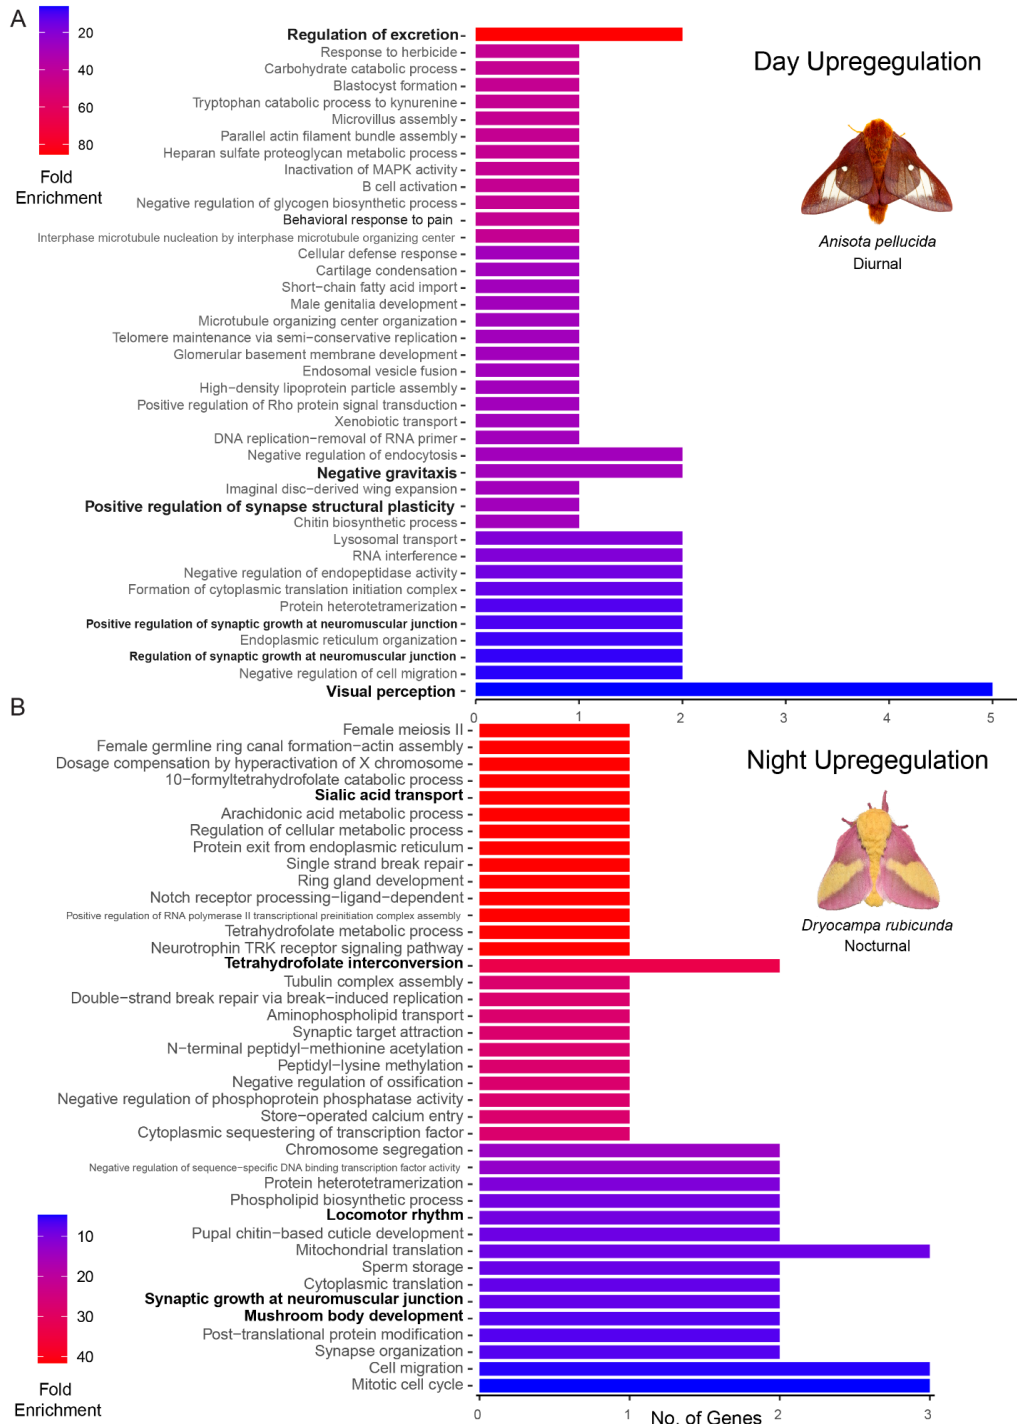

471

472 **Figure 3:** Visual genes are upregulated in the diurnal species during the day, and energy utilization,  
 473 brain olfactory region and locomotion in the nocturnal species during the night.  
 474 Go enrichment of highly upregulated genes recovered from both DEG analyses coinciding with the  
 475 species, highlighting the two modules that showed species specific clustering patterns.  
 476 A: Enrichment of **day** upregulated genes in diurnal *Dryocampa*. B Enrichment of **night** upregulated  
 477 genes in nocturnal *Anisota*. Go enrichment was done using the custom ShinyGo database v0.75c  
 478 using *Bombyx* gene IDs. FDR cutoff  $\leq 0.17$ , and only Biological Process GO terms were selected  
 479 with Min. pathway size =1. Input genes had  $FC > 5$ ,  $padj. < 0.05$  and recovered both in EdgeR and  
 480 DeSeq2 were used with the background being all orthologous *Bombyx mori* genes for either species.  
 481

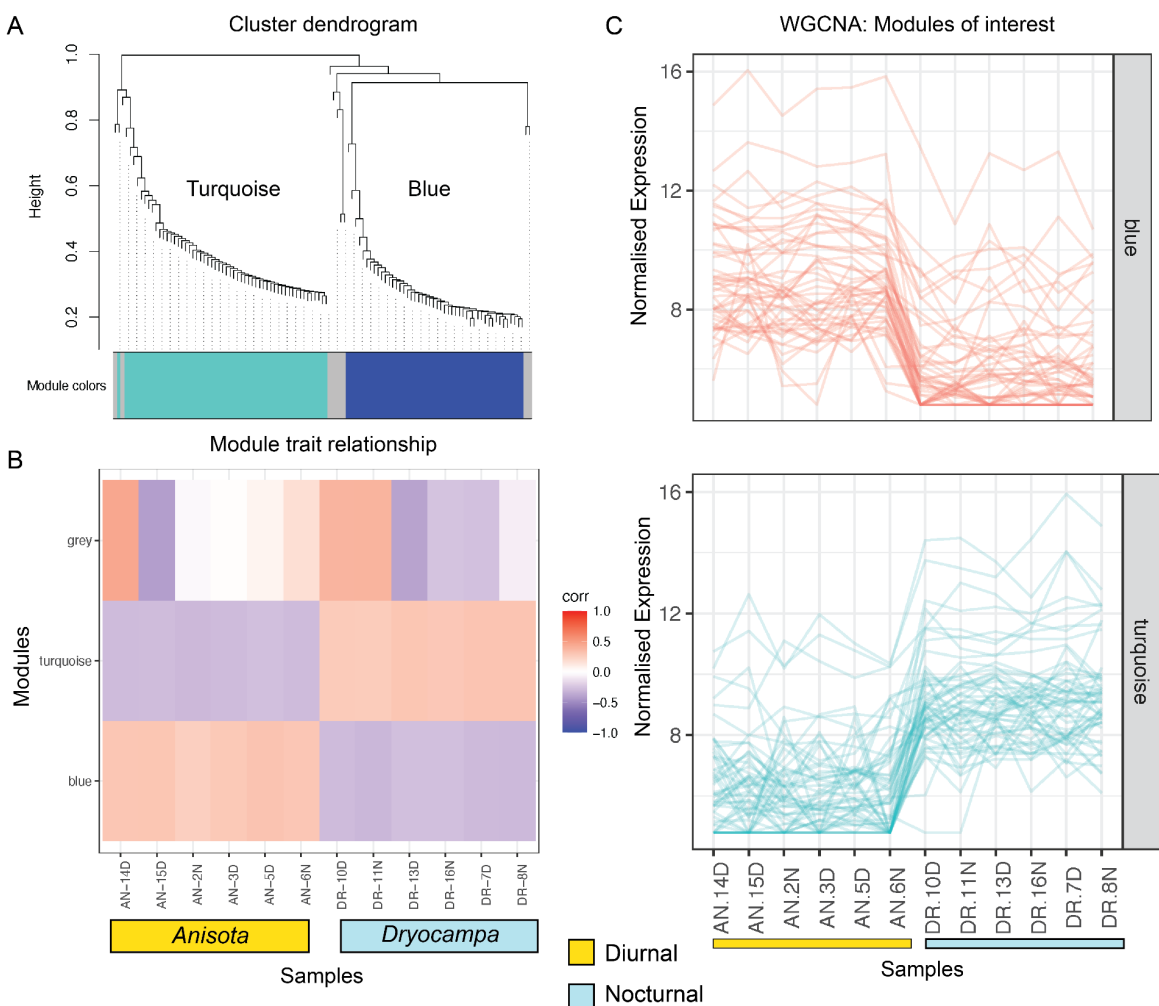

482 **Figure 4:** Modules of clustered co-expressed genes grouped using normalized expression  
 483 highlighting the two modules that showed species specific clustering patterns.  
 484 A: Cluster dendrogram shows WGCNA clusters. B: Shows how patterns of gene expression correlate  
 485

486 across samples and modules. C: Shows the normalized expression for all  
487 genes across samples. The species show two sets of 50 genes (Blue) and (Turquoise) that have clear  
488 species specific expression patterns. Normalization was done with DESeq2 and reads were mapped  
489 to the more stringently filtered transcriptome. A soft power analysis was done and the picked  
490 power=9 for the WGCNA analysis. AN: *Anisota*, DR: *Dryocampa*, Numbered D and N represent the  
491 different samples collected at day and night time points.

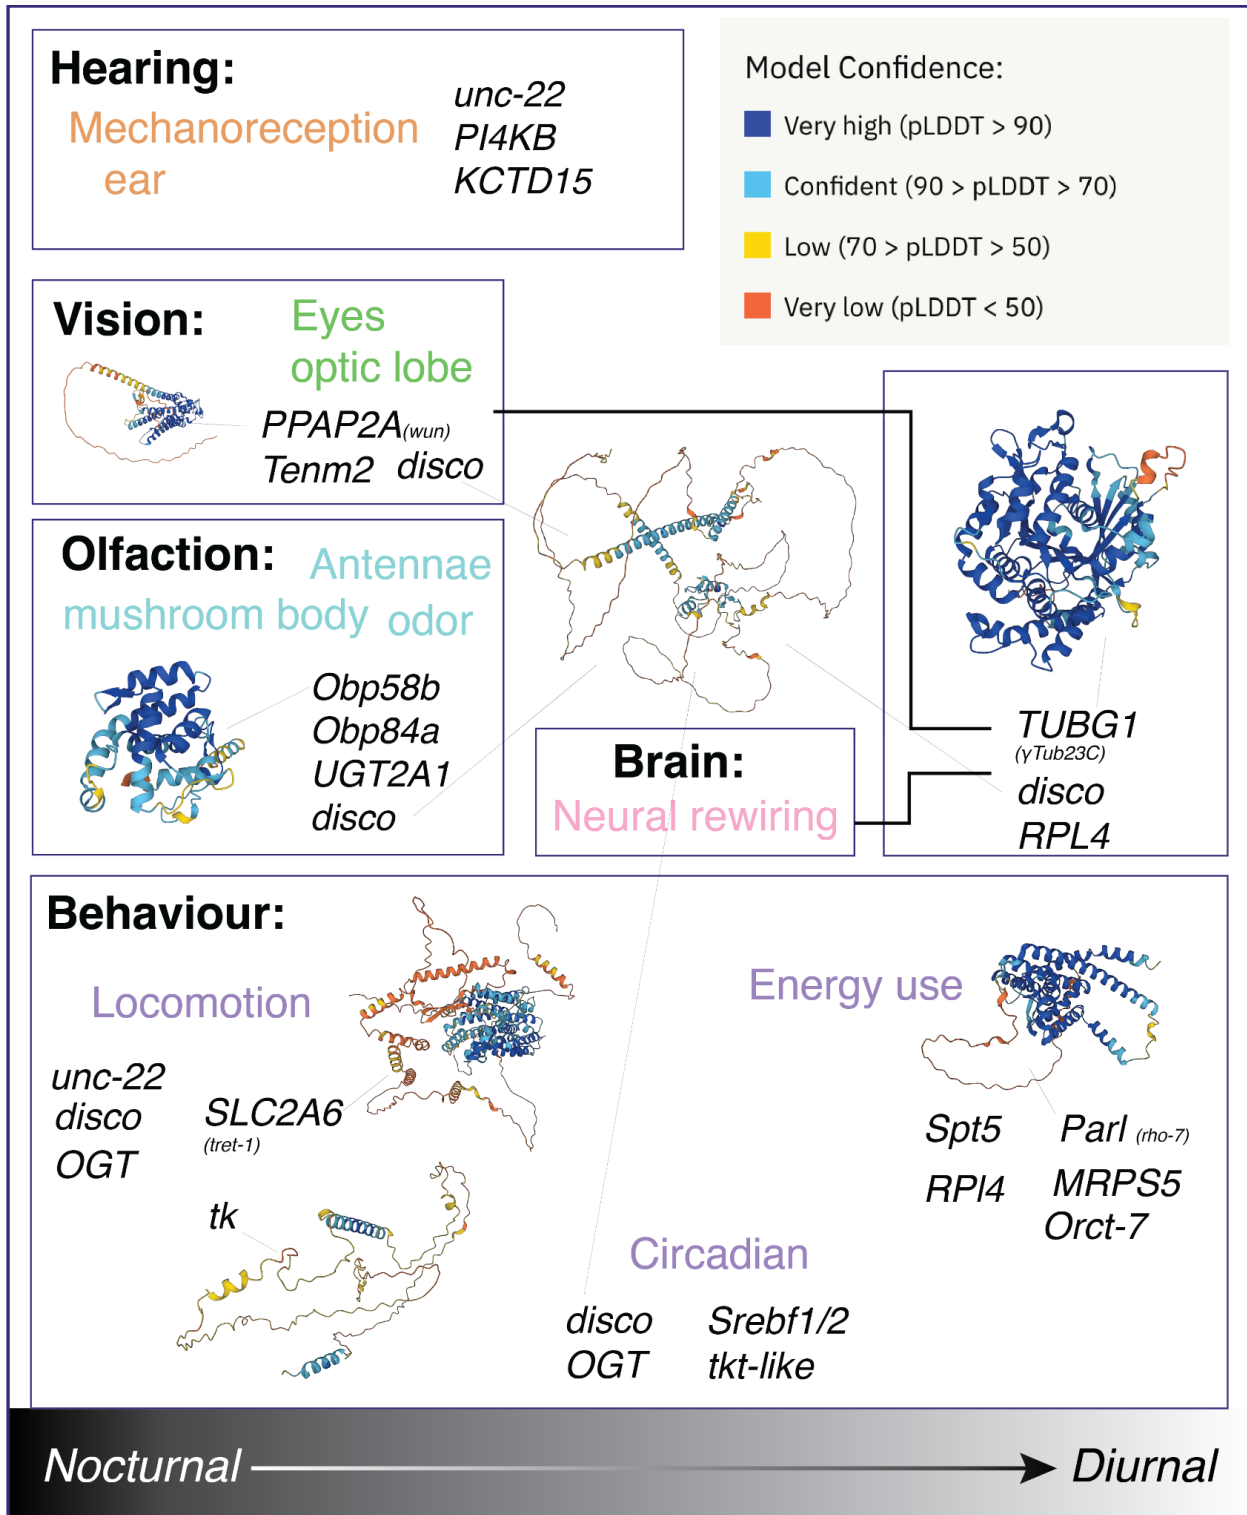

492  
 493  
 494

**Figure 5:** Model for diel-niche shift from and genes of interest obtained from GO searches and annotating divergently expressed genes. For representative purposes, homologs from *Drosophila*

495 *melanogaster* have been used, with colors in the 3d structures representing Alpha fold per-residue  
 496 confidence metric (pLDDT), the range for each color is shown on the top left. Model moth (*Bombyx*  
 497 *mori*) proteins were also modeled for a subset of proteins, see Supplementary data.  
 498

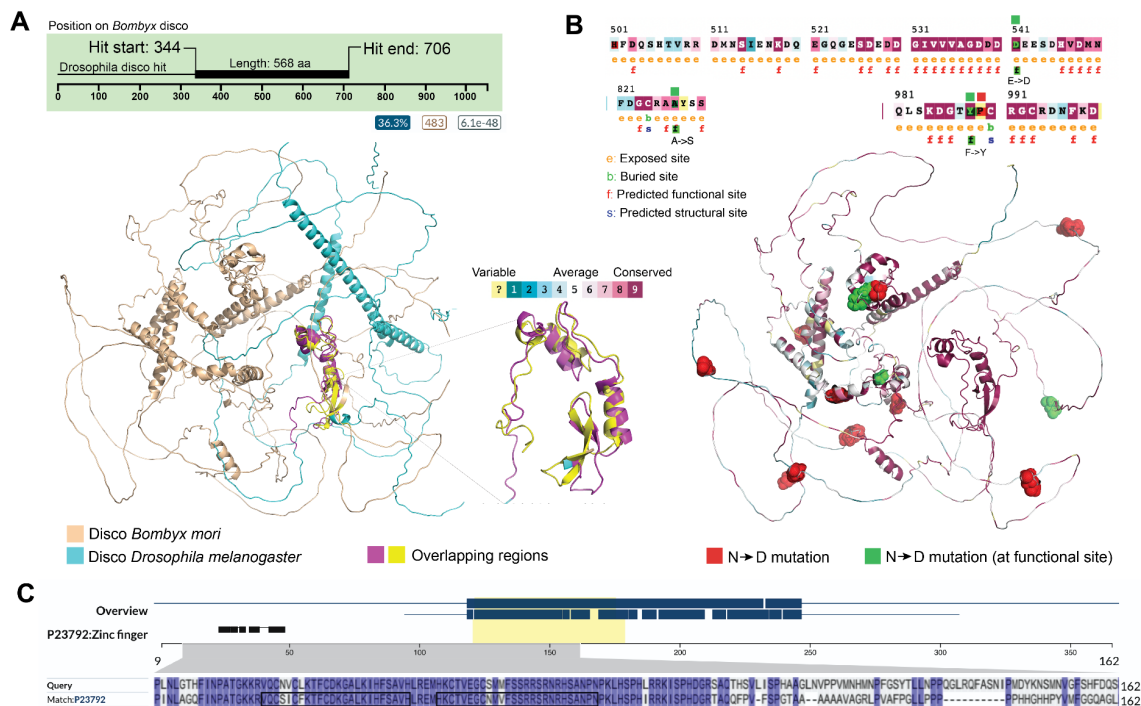

499  
 500  
 501 **Figure 6:** *Disco* has 150 amino acid long highly conserved region across *Bombyx* (1054 aa) &  
 502 *Drosophila* (568 aa) involved in its role as a transcription factor, but it also has other roles in  
 503 Lepidoptera due to the presence of other highly conserved and predicted functional regions, that are  
 504 not present in flies, and only in Lepidoptera. 3/14 of the mutations between nocturnal to diurnal  
 505 species map to these regions (>500 aa).  
 506 (A) Top: *Disco* best Uniprot hit in *Drosophila* using default settings (blastp, e-threshold 10, Auto-  
 507 Blosum62). Bottom: *disco* aligned and superimposed predicted structures for the silk moth and  
 508 vinegar fly. Peach structure: *Bombyx mori* alpha-fold predicted structure for *disco*, Cyan: *Drosophila*  
 509 *melanogaster* alpha-fold predicted structure for *disco* (B) Top: Partial views of the Consurf predicted  
 510 residues for *disco*. The views encompassing the region where 3 mutations of the 14 mutated sites  
 511 between Nocturnal *Dryocampa* and Diurnal *Anisota* overlap with predicted functional residues.  
 512 Bottom: Residues that were mutated between the nocturnal and diurnal species are highlighted on an  
 513 overlay of the Consurf scores mapped onto the predicted alpha fold structure of *disco* from *Bombyx*  
 514 *mori*. Green residues indicate mutated and predicted functional sites, red indicate mutated sites that  
 515 did not have a predicted residue. (C) Overlap of the highly conserved region of *disco* this region  
 516 includes the zinc-finger domain that is characteristic of *disco* transcription factor.

517

## 518 **Supplemental Methods**

### 519 **Insect rearing:**

520 Moths were reared under natural light-dark cycles at room temperature (25°C) and natural light  
521 conditions at the McGuire Center for Lepidoptera and Biodiversity (MGCL). Adults were sampled  
522 two days after eclosion at the two time points by C.H. and R.S.L.

523

### 524 **Sampling design:**

525 We collected 3-5 replicates (i.e., individual moths) per experimental treatment. We sampled at two  
526 time points per species at two midpoints of their circadian cycle at noon ('day') and midnight  
527 ('night') (Fig. 1, Table 1). Moths were allowed to eclose naturally and sexed, To ensure vision genes  
528 were not artificially stimulated, for collection at night we used red light, which is thought to not  
529 stimulate most Lepidoptera insect visual systems (95). We used a sterilized scalpel to remove the  
530 head, which was placed in a 1.5 ml Eppendorf tube, which was immediately placed in liquid  
531 nitrogen and stored at -80°C. It is worth noting that only males of most *Anisota* species are diurnal,  
532 including *A. pellucida*, our focal taxon. Females of all *Anisota* and both sexes of at least *A. stigma*,  
533 are nocturnal. In *Dryocampa*, both males and females are nocturnal. We therefore limited our  
534 transcriptomic work to males of *A. pellucida* and *D. rubicunda*.

535

### 536 **RNA extraction and quality control:**

537 Tissue was removed from liquid nitrogen and placed into a flat-bottomed cryo-tube with Trizol and  
538 2-4 sterile, stainless-steel beads. The tissue was homogenized using a bead beater for 2.5 minutes at  
539 1900 RPM. Beads were removed with a magnet, and chloroform added to separate phases.  
540 Isopropanol precipitated the RNA, followed by several ethanol wash steps to pellet the RNA. Quality  
541 Control (QC) was undertaken with a high sensitivity Qubit assay. Samples with yields > 20 ng/μL  
542 were cleaned using a Thermo Scientific RapidOut DNA Removal Kit (Waltham, Massachusetts,  
543 USA). Sample quality was verified using Agilent 2200 TapeStation. Since heads comprised of a  
544 relatively small amount of tissue, initial extractions using kit-based methods resulted in low yields.  
545 Several rounds of troubleshooting were required before completion of extraction using a modified  
546 Trizol based protocol with a DNA clean up step. We measured the quantity of RNA using a Qubit

547 fluorometer and used Agilent tapestation or Bioanalyzer to characterize extraction quality, weight,  
548 and size distributions. Where possible, a concentration of more than 10 ng/μL was used for library  
549 preparation. Yields below 10 ng/μL were prone to higher loss when purifying with a DNase agent,  
550 which often caused 20-30 % loss in RNA yield, approaching 5ng/μL is below the Qubit detection  
551 threshold (Table S1).

552

### 553 **Library preparation and NGS sequencing:**

554 Libraries were prepared by sequencing cores at NBAF-Liverpool using the NEB polyA selection and  
555 NEBNext Ultra II directional stranded kit, suitable for low input yields. 12 samples were run on one  
556 lane of an Illumina NovaSeq using SP chemistry (Paired-end, 2x150 bp sequencing). Samples were  
557 shipped overnight from MCGL to the NERC-NBAF after dehydrating in a biosafety chamber using  
558 GenTegra RNA tubes.

559

### 560 **Read trimming and cleanup:**

561 For *Anisota pellucida* and *Dryocampa rubicunda*, trimming was undertaken by the NERC-NBAF  
562 core and the raw Fastq files were trimmed for the presence of Illumina adapter sequences using  
563 Cutadapt version 1.2 (96). The option -O 3 was used, so the 3' end of any reads that match the  
564 adapter sequence for 3 bp or more were trimmed. Trimming was also done with trimmomatic. The  
565 reads are further trimmed using Sickle version 1.200 with a minimum window quality score of 20.  
566 Reads shorter than 15 bp after trimming were removed.

567

### 568 **Transcriptome library sizes, QC, and PCA:**

569 Quality Control (QC) was conducted on the trimmed reads, library size varied for each species (Fig.  
570 S1). We examined expression data and removed genes with TPM < 1. PCA results showed that  
571 *Anisota* and *Dryocampa* did not separate with diel-niche (Fig. S3).

572

### 573 **De novo assemblies:**

574 We combined reads from multiple samples and generated several reference de novo transcriptomes  
575 using different assemblers, and then combining them, compared their quality using BUSCO scores  
576 and number of single-copy BUSCO genes across the different versions (see Table 2 for the BUSCO



577 scores, redundancy and duplication for the various assemblies). We found that unfiltered assemblies  
578 were highly redundant, but had the highest BUSCO scores. These assemblies were too  
579 overrepresented to be used in any downstream analysis so we used Transrate, CD-HIT, MMEq2, as  
580 well as Transdecoder, to filter the assemblies. We chose v5 and v6 to use in downstream analysis,  
581 listed as the last two assemblies for each species (Table 3) and repeated certain analyses with both  
582 assemblies to see how stringent or a less stringent filter would affect the results.

583

#### 584 **Multi assembler *de novo* transcriptome assembly:**

585 To our knowledge, there is no publicly available annotated reference genome for the two species  
586 used in this study at the time the analyses were performed; therefore, we chose to build a *de novo*  
587 transcriptome assembly with the pre-processed reads using the NCGAS pipeline, which combines  
588 multiple assemblers and then uses an evidence-based gene modeler to decide on the final set. For  
589 each species, we combined forward and reverse reads from all samples and normalized them using a  
590 normalization script in Trinity v2.12.0 (97). Normalized reads were used as input to generate  
591 assemblies using Velvet v1.2.10 (98), TransAbyss v2.0.1 (99) , SOAPdenovo v1.03 (100) with  
592 various kmer sizes. These assemblies were combined and filtered using Evigenes v4: 2020, March  
593 (101, 102), transdecoder and filtered with scripts provided in the NCGAS pipeline (103).

594

#### 595 **Transcriptome QC, annotation and filtering:**

596 Further quality control and filtering was conducted using BUSCO (104), transrate (105), QUAST  
597 (106) (v5.02), CD-HIT(v4.6.8) (107, 108)and cascaded clustering with MMseqs2 (v12) (109).  
598 BUSCO scores were greater than 95%, but many genes had multiple versions from the different  
599 assemblers, and because this would bias the downstream analyses we attempted to reduce the  
600 redundancy at the cost of lowering BUSCO scores. Protein coding regions were predicted using  
601 TransDecoder (<https://github.com/TransDecoder/TransDecoder>) and the cds file from was run  
602 through Transrate (105), which further pulled contigs based on mapping rate and identified a “good”  
603 collection of transcripts, the resulting protein-coding sequences were filtered with additional CD-HIT  
604 (107, 108)and MMseqs2 (109) filtering. This resulted in lower BUSCO scores 75-85% but also much  
605 lower redundancy in the gene set of about 1-3 fold. We ran the WGCNA (52) and GO enrichment  
606 (110) analyses on the more stringent assemblies (BUSCO 75%, 2% genes with duplication) since

607 they are more sensitive to redundancy, but RNA-seq was run across the slightly lower stringency  
608 analyses to be more inclusive (BUSCO~85%, 60-70% genes with duplications).

609

#### 610 **Annotation of reference transcriptomes:**

611 Reference genomes were annotated with eggNOGmapper and Orthofinder (54, 55). We also tried  
612 annotating the reference transcriptomes with Trinotate (111), which run against the swissprot and  
613 pfam databases using hmmscan, blastx, blastp, signalP and tmmhmm, KEGG, and GO and eggNOG  
614 (49, 110, 112–120). ORF predictions for orthofinder were obtained using *Antheraea pernyi* as a  
615 model. Orthofinder was run with well-annotated Bombycidae and Saturniidae moths, *Bombyx mori*,  
616 *Antheraea pernyi*, and *Antheraea yamamai*, to generate clusters. *Bombyx mori* was a useful reference  
617 since the Orthofinder cluster for each species generated a list of mostly single-copy genes for which  
618 more Lepidoptera annotations were available from SilkDBv3 (40). While this was not as complete as  
619 trinotate, the annotations provided from this procedure were more accurate than Trinotate. Trinotate  
620 annotation had many more human/ vertebrate hits than insect matches than eggNOGmapper and  
621 Orthofinder transferred annotations, so while the files are provided as a reference, they were not used  
622 in downstream analyses.

623

#### 624 **Differential gene expression (DGE):**

625 Reads were mapped using Salmon (121) and differential gene expression analysis was conducted  
626 using EdgeR (122) and DESeq2 (123). EdgeR(v 3.38.1) was used to normalize and test for  
627 significantly expressed genes. DESeq2(v1.36.0) was also used to normalize and to generate PCAs  
628 and other summary statistics. We used 'Day' as the treatment and 'Night' as the control for all  
629 groups with EdgeR, although the order of fold change switched for DESeq2. The p-values obtained  
630 were adjusted to account for multiple hypothesis testing with FDR for EdgeR and adjusted p-value  
631 from DESeq2. Genes with FDR or adjusted p-values <0.05 and |FC| > 2 were used as a criteria to  
632 identify significantly expressed genes.

633

#### 634 **Gene enrichment analysis:**

635 We performed gene enrichment analysis using GO terms with the tools TopGO v2.48.0 (124) and  
636 ShinyGo v0.75c (125) (<http://bioinformatics.sdstate.edu/goc/>). This analysis involved comparing the

637 selected genes of interest to a gene universe with GO term annotations to determine if there were  
638 overrepresented or underrepresented GO terms. To obtain genes with GO annotations, we utilized  
639 similarity clusters to map annotations from *Bombyx mori*.

640 In TopGO, we employed a more stringent approach by using filtered transcriptomes to  
641 mitigate bias from gene duplications. We selected genes of interest based on a False Discovery Rate  
642 (FDR) threshold of less than 0.05. We ran two different enrichment algorithms, 'classic' and 'elim',  
643 and used two test statistics, Fisher's exact test and a Kolmogorov-Smirnov-like test. The tests were  
644 performed for both 'Biological Process' (BP) and 'Molecular Function' (MF) categories. While we  
645 generated tables of significantly enriched GO terms, obtaining individual genes within each group  
646 was limited due to the constraints of TopGO with custom annotations.

647 For ShinyGO, we utilized the custom v0.75c which included the updated *Bombyx mori*  
648 genome stringent. For all analysis, we used the following settings (pathway size: min.=1,  
649 max=2000). The settings for number of pathways to show and FDR cut-offs were chosen to represent  
650 the entire list of top 100 genes in the final datasets, although in some cases a fewer number are  
651 represented in the visualizations. We focused on the 'Biological Process' (BP) category for the  
652 various tests. Tables of GO terms, gene information, and graphs summarizing the significantly  
653 enriched GO terms were generated. We repeated several different analyses **1)** A less stringent  
654 analysis was run where genes with  $FC < |2|$  and  $padj. < 0.05$ . This was useful to visualize the genes up  
655 and downregulated functionally and the background used was all the genes recovered from the DEA  
656 analysis that had orthologs. An FDR cut-off  $< 0.1-0.3$ . For the background gene set, we used the  
657 species' de-novo transcriptome matching *Bombyx* ortholog set.

658 **2)** A more stringent criteria was used to examine highly upregulated genes a  $FC < |5|$  and  $padj.$   
659  $< 0.05$  cutoff was used, and filtering only genes that occurred in both EdgeR and DESeq2 analyses.  
660 We selected a single representative when multiple *Bombyx* orthologs were recovered, using the  
661 ortholog with the most complete annotation. An FDR cut-off  $< 0.17$  was used. For the background  
662 gene set, we used the species' de-novo transcriptome matching *Bombyx* ortholog set.

663 **3)** For WGCNA clusters tan and grey60, we used their respective species background  
664 expressed transcript set with a FDR cutoff  $\leq 0.1$ . For blue and turquoise, the background of all  
665 orthologs found in *Bombyx mori* was used. An FDR cutoff  $< 1$  was used, since smaller values  
666 provided insufficient genes given the larger number of genes being tested.

667

668 **Gene network analysis:**

669 Gene network analysis was undertaken with WGCNA (1.71) (52, 126). DeSeq2 was used to  
670 normalize reads and data was formatted with tidyverse. WGCNA identifies modules of co-expressed  
671 genes. We chose modules that showed clear day-night differences and mapped the GO terms with  
672 Revigo and ShinyGo. We also combined counts from both species and tested for clusters. Here we  
673 chose modules that showed species specific clusters.

674

675 **Gene annotation and filtering:**

676 DEGs, enriched genes and or co-expressed transcripts/ genes were annotated by cross referencing  
677 them with the *B. mori* annotations (see above). Since *B. mori* mappings were not always 'one-to-  
678 one', mappings that were 'one-to-many' were dropped, i.e., transcripts that mapped to multiple  
679 *Bombyx* genes were dropped. We also improved annotation by mapping the overlapping transcripts  
680 with eggnog mapper. We further filtered these genes into sub functional categories, by identifying  
681 genes with GO annotations or descriptions linked to vision, smell, hearing, circadian, behavior and  
682 brain the list of go terms for each group was obtained by querying amigo  
683 (<http://amigo.geneontology.org/>) (Table 8).

684

685 **Gene Mining and in-silico evolution:**

686 We mined genes of interest from ~bombycoidea moths and closely related families that had well  
687 annotated genomes on Ensembl and NCBI (Supp Table 6) and across model insects (Supp. Table 7).  
688 These genomes were chosen as all Bombycoidea from Ensembl with well annotated assemblies and  
689 five species Noctuidae and Geometridae each were included as close relatives. We added *Bombyx*  
690 *mori* as a reference and *Antheraea pernyi* to represent Saturniidae, and their peptide files were taken  
691 from their respective source papers (40–42). For insects, we chose long-read well annotated genomes  
692 from Ensembl (Ensembl Gene build) and five model systems from insect base (127). We ran  
693 Orthofinder (v2.5.2) (49, 55) with 'orthofinder -f bom-rel/ -S diamond -M msa -A mafft -T fasttree -a  
694 1 -X -z -t 16' to recover orthologs. Each orthogroup often contained multiple sequences per species.  
695 We chose the sequence with the highest identity to the reference *Bombyx mori* sequence using  
696 custom python scripts. In the rare instances where there were multiple references, we took the longest

697 one. To model the 3D structure of each reference *Bombyx mori* sequence, we ran AlphaFold v2.1.2  
698 (128) using Deepmind's run\_alphafold.py  
699 ([https://github.com/deepmind/alphafold/blob/main/run\\_alphafold.py](https://github.com/deepmind/alphafold/blob/main/run_alphafold.py)) on University of Florida's  
700 HiperGator. Model database files (i.e. BFD, MAGnify, PDB70, mmCIF PDB, UniRef30, UniRef90)  
701 downloaded from Deepmind in February 2022 were used as parameter value inputs. All other  
702 parameters were used with default settings. The relaxed predicted model with highest ranked pLDDT  
703 (per-residue estimate corresponding to model's predicted score on the IDDT-C $\alpha$  metric) was chosen  
704 as the final model (129).

705 We calculated a conservation score for each alignment using Alistat. For alignments less than 1500  
706 amino acids and with high conservation score (Proteins larger than 1300 aa were difficult to model  
707 without high memory GPU's), we modeled conservation using Consurf (130–134). The results were  
708 displayed using Jmol first glance viewer (<http://firstglance.jmol.org/>) and as screenshots from the  
709 default viewer. The output for alpha fold runs and consurf is available in the (Supplementary Data).  
710 PyMol (135) was used to align the 3D structures and Aliview was used to compare alignments. We  
711 used InterProscan (<https://www.ebi.ac.uk/interpro/about/interproscan/>) and NetPhos3.1 (136, 137)  
712 for predicting the domains and phosphorylated sites.

713

## 714 **References**

- 715 1. Y. Xiao, Y. Yuan, M. Jimenez, N. Soni, S. Yadlapalli, Clock proteins regulate spatiotemporal  
716 organization of clock genes to control circadian rhythms. *Proc. Natl. Acad. Sci. U. S. A.* **118** (2021).
- 717 2. K. Beer, C. Helfrich-Förster, Model and Non-model Insects in Chronobiology. *Front. Behav.*  
718 *Neurosci.* **14**, 601676 (2020).
- 719 3. D. Székely, D. Cogălniceanu, P. Székely, M. Denoël, Adult-Juvenile interactions and temporal niche  
720 partitioning between life-stages in a tropical amphibian. *PLoS One* **15**, e0238949 (2020).
- 721 4. D. Wang, G. Yang, W. Chen, Diel and Circadian Patterns of Locomotor Activity in the Adults of  
722 Diamondback Moth (*Plutella xylostella*). *Insects* **12** (2021).
- 723 5. J. H. Fullard, N. Napoleone, Diel flight periodicity and the evolution of auditory defences in the  
724 Macrolepidoptera. *Anim. Behav.* **62**, 349–368 (2001).
- 725 6. R. Refinetti, The diversity of temporal niches in mammals. *Biol. Rhythm Res.* **39**, 173–192 (2008).
- 726 7. A. Y. Kawahara, *et al.*, Diel behavior in moths and butterflies: a synthesis of data illuminates the  
727 evolution of temporal activity. *Organisms Diversity and Evolution* **18**, 13–27 (2018).

- 728 8. D. T. C. Cox, A. S. Gardner, K. J. Gaston, Diel niche variation in mammals associated with  
729 expanded trait space. *Nat. Commun.* **12**, 1753 (2021).
- 730 9. Y. Basset, N. D. Springate, Diel activity of arboreal arthropods associated with a rainforest tree. *J.*  
731 *Nat. Hist.* **26**, 947–952 (1992).
- 732 10. P. J. Devries, G. T. Austin, N. H. Martin, Diel activity and reproductive isolation in a diverse  
733 assemblage of Neotropical skippers (Lepidoptera: HesperIIDae). *Biol. J. Linn. Soc. Lond.* **94**, 723–  
734 736 (2008).
- 735 11. S. R. Anderson, J. J. Wiens, Out of the dark: 350 million years of conservatism and evolution in diel  
736 activity patterns in vertebrates. *Evolution* **71**, 1944–1959 (2017).
- 737 12. S. Frey, J. T. Fisher, A. C. Burton, J. P. Volpe, Investigating animal activity patterns and temporal  
738 niche partitioning using camera-trap data: challenges and opportunities. *Remote Sens. Ecol. Conserv.*  
739 **3**, 123–132 (2017).
- 740 13. R. Steen, Diel activity, frequency and visit duration of pollinators in focal plants: in situ automatic  
741 camera monitoring and data processing. *Methods Ecol. Evol.* **8**, 203–213 (2017).
- 742 14. H. K. Gill, G. Goyal, R. McSorley, Diel Activity of Fauna in Different Habitats Sampled at the  
743 Autumnal Equinox. *Fla. Entomol.* **95**, 319–325 (2012).
- 744 15. B. Murugavel, A. Kelber, H. Somanathan, Light, flight and the night: effect of ambient light and  
745 moon phase on flight activity of pteropodid bats. *J. Comp. Physiol. A Neuroethol. Sens. Neural*  
746 *Behav. Physiol.* **207**, 59–68 (2021).
- 747 16. H. Somanathan, *et al.*, Nocturnal bees feed on diurnal leftovers and pay the price of day – night  
748 lifestyle transition. *Front. Ecol. Evol.* **8** (2020).
- 749 17. R. M. Borges, H. Somanathan, A. Kelber, Patterns and Processes in Nocturnal and Crepuscular  
750 Pollination Services. *Q. Rev. Biol.* **91**, 389–418 (2016).
- 751 18. S. M. Tierney, *et al.*, Consequences of evolutionary transitions in changing photic environments.  
752 *Austral Entomology* **56**, 23–46 (2017).
- 753 19. W. T. Wcislo, *et al.*, The evolution of nocturnal behaviour in sweat bees, *Megalopta genalis* and *M.*  
754 *ecuadoria* (Hymenoptera: Halictidae): an escape from competitors and enemies? *Biol. J. Linn. Soc.*  
755 *Lond.* **83**, 377–387 (2004).
- 756 20. A. L. Stockl, W. A. Ribí, E. J. Warrant, Adaptations for Nocturnal and Diurnal Vision in the  
757 Hawkmoth Lamina. *J. Comp. Neurol.* **524**, 160–175 (2016).
- 758 21. Y. Wu, *et al.*, Retinal transcriptome sequencing sheds light on the adaptation to nocturnal and  
759 diurnal lifestyles in raptors. *Sci. Rep.* **6**, 1–12 (2016).
- 760 22. T. Akiyama, H. Uchiyama, S. Yajima, K. Arikawa, Y. Terai, Parallel evolution of opsin visual  
761 pigments in hawkmoths by tuning of spectral sensitivities during transition from a nocturnal to a  
762 diurnal ecology. *J. Exp. Biol.* **225**, jeb244541 (2022).

- 763 23. Y. Sondhi, E. Elis, S. Bybee, J. Theobald, A. Kawahara, Light environment drives evolution of color  
764 vision genes in butterflies and moths (2021) <https://doi.org/10.5061/dryad.gmsbcc2kr> (May 13,  
765 2022).
- 766 24. M. Izutsu, A. Toyoda, A. Fujiyama, K. Agata, N. Fuse, Dynamics of Dark-Fly Genome Under  
767 Environmental Selections. *G3* **6**, 365–376 (2015).
- 768 25. J. E. Yack, J. H. Fullard, Ultrasonic hearing in nocturnal butterflies. *Nature* **403**, 265–266 (2000).
- 769 26. F. Sandrelli, R. Costa, C. P. Kyriacou, E. Rosato, Comparative analysis of circadian clock genes in  
770 insects. *Insect Mol. Biol.* **17**, 447–463 (2008).
- 771 27. R. Závodská, I. Sauman, F. Sehna, Distribution of PER protein, pigment-dispersing hormone,  
772 prothoracicotropic hormone, and eclosion hormone in the cephalic nervous system of insects. *J. Biol.*  
773 *Rhythms* **18**, 106–122 (2003).
- 774 28. C. Hermann, *et al.*, The circadian clock network in the brain of different *Drosophila* species. *J.*  
775 *Comp. Neurol.* **521**, 367–388 (2013).
- 776 29. C. A. Hamilton, *et al.*, Phylogenomics resolves major relationships and reveals significant  
777 diversification rate shifts in the evolution of silk moths and relatives. *BMC Evol. Biol.* (2019)  
778 <https://doi.org/10.1186/s12862-019-1505-1>.
- 779 30. A. Kobelková, R. Závodská, I. Sauman, O. Bazalová, D. Dolezel, Expression of clock genes period  
780 and timeless in the central nervous system of the Mediterranean flour moth, *Ephestia kuehniella*. *J.*  
781 *Biol. Rhythms* **30**, 104–116 (2015).
- 782 31. D. Brady, A. Saviane, S. Cappellozza, F. Sandrelli, The Circadian Clock in Lepidoptera. *Front.*  
783 *Physiol.* **12**, 776826 (2021).
- 784 32. S. Iwai, Y. Fukui, Y. Fujiwara, M. Takeda, Structure and expressions of two circadian clock genes,  
785 period and timeless in the commercial silkworm, *Bombyx mori*. *J. Insect Physiol.* **52**, 625–637  
786 (2006).
- 787 33. A. Macias-Muñoz, A. G. Rangel Olguin, A. D. Briscoe, Evolution of Phototransduction Genes in  
788 Lepidoptera. *Genome Biol. Evol.* **11**, 2107–2124 (2019).
- 789 34. X.-C. Jiang, *et al.*, Identification of Olfactory Genes From the Greater Wax Moth by Antennal  
790 Transcriptome Analysis. *Front. Physiol.* **12**, 663040 (2021).
- 791 35. A. de Fouchier, *et al.*, Functional evolution of Lepidoptera olfactory receptors revealed by  
792 deorphanization of a moth repertoire. *Nat. Commun.* **8**, 15709 (2017).
- 793 36. J. W. Truman, L. M. Riddiford, Neuroendocrine control of ecdysis in silkworms. *Science* **167**, 1624–  
794 1626 (1970).
- 795 37. I. Sauman, S. M. Reppert, Circadian clock neurons in the silkworm *Antheraea pernyi*: novel  
796 mechanisms of Period protein regulation. *Neuron* **17**, 889–900 (1996).

- 797 38. P. M. Tuskes, J. P. Tuttle, M. M. Collins, *The Wild Silk Moths of North America: A Natural History*  
798 *of the Saturniidae of the United States and Canada* (Cornell University Press, 1996).
- 799 39. M. M. Collins, P. M. Tuskes, REPRODUCTIVE ISOLATION IN SYMPATRIC SPECIES OF  
800 DAYFLYING MOTHS (HEMILEUCA: SATURNIIDAE). *Evolution* **33**, 728–733 (1979).
- 801 40. F. Lu, *et al.*, SilkDB 3.0: visualizing and exploring multiple levels of data for silkworm. *Nucleic*  
802 *Acids Res.* **48**, D749–D755 (2020).
- 803 41. S.-R. Kim, *et al.*, Genome sequence of the Japanese oak silk moth, *Antheraea yamamai*: the first  
804 draft genome in the family Saturniidae. *Gigascience* **7**, 1–11 (2018).
- 805 42. J. Duan, *et al.*, A chromosome-scale genome assembly of *Antheraea pernyi* (Saturniidae,  
806 Lepidoptera). *Mol. Ecol. Resour.* **20**, 1372–1383 (2020).
- 807 43. H. Langer, G. Schmeineck, F. Anton-Erxleben, Identification and localization of visual pigments in  
808 the retina of the moth, *Antheraea polyphemus* (Insecta, Saturniidae). *Cell Tissue Res.* **245**, 81–89  
809 (1986).
- 810 44. I. Kitching, *et al.*, A global checklist of the Bombycoidea (Insecta: Lepidoptera). *Biodiversity Data*  
811 *Journal* **6**, e22236 (2018).
- 812 45. M. J. Scoble, *The Lepidoptera. Form, function and diversity* (Oxford University Press, 1992).
- 813 46. Lemaire, Minet, 18. The Bombycoidea and their Relatives. *Volume 1: Evolution, Systematics, and*  
814 (2013).
- 815 47. R. Rougerie, *et al.*, Phylogenomics Illuminates the Evolutionary History of Wild Silkmoths in Space  
816 and Time (Lepidoptera: Saturniidae). *bioRxiv*, 2022.03.29.486224 (2022).
- 817 48. Z. Wang, M. Gerstein, M. Snyder, RNA-Seq: a revolutionary tool for transcriptomics. *Nat. Rev.*  
818 *Genet.* **10**, 57–63 (2009).
- 819 49. D. M. Emms, S. Kelly, OrthoFinder: solving fundamental biases in whole genome comparisons  
820 dramatically improves orthogroup inference accuracy. *Genome Biol.* **16**, 157 (2015).
- 821 50. D. Li, *et al.*, An evaluation of RNA-seq differential analysis methods. *PLoS One* **17**, e0264246  
822 (2022).
- 823 51. N. Sánchez-Baizán, L. Ribas, F. Piferrer, Improved biomarker discovery through a plot twist in  
824 transcriptomic data analysis. *BMC Biol.* **20**, 208 (2022).
- 825 52. P. Langfelder, S. Horvath, WGCNA: an R package for weighted correlation network analysis. *BMC*  
826 *Bioinformatics* **9**, 559 (2008).
- 827 53. Lafayette Lafayette Press, *A Survey of Best Practices for RNA-Seq Data Analysis* (CreateSpace  
828 Independent Publishing Platform, 2016).
- 829 54. C. P. Cantalapiedra, A. Hernández-Plaza, I. Letunic, P. Bork, J. Huerta-Cepas, eggNOG-mapper v2:



- 830 Functional Annotation, Orthology Assignments, and Domain Prediction at the Metagenomic Scale.  
831 *Mol. Biol. Evol.* **38**, 5825–5829 (2021).
- 832 55. D. M. Emms, S. Kelly, OrthoFinder: phylogenetic orthology inference for comparative genomics.  
833 *Genome Biol.* **20**, 238 (2019).
- 834 56. P. E. Hardin, J. C. Hall, M. Rosbash, Behavioral and molecular analyses suggest that circadian  
835 output is disrupted by disconnected mutants in *D. melanogaster*. *EMBO J.* **11**, 1–6 (1992).
- 836 57. M. S. Dushay, M. Rosbash, J. C. Hall, The disconnected visual system mutations in *Drosophila*  
837 *melanogaster* drastically disrupt circadian rhythms. *J. Biol. Rhythms* **4**, 1–27 (1989).
- 838 58. K. J. Lee, M. Mukhopadhyay, P. Pelka, A. R. Campos, H. Steller, Autoregulation of the *Drosophila*  
839 disconnected gene in the developing visual system. *Dev. Biol.* **214**, 385–398 (1999).
- 840 59. V. Suri, Z. Qian, J. C. Hall, M. Rosbash, Evidence that the TIM light response is relevant to light-  
841 induced phase shifts in *Drosophila melanogaster*. *Neuron* **21**, 225–234 (1998).
- 842 60. B. K. Dey, X.-L. Zhao, E. Popo-Ola, A. R. Campos, Mutual regulation of the *Drosophila*  
843 disconnected (*disco*) and *Distal-less* (*Dll*) genes contributes to proximal-distal patterning of antenna  
844 and leg. *Cell Tissue Res.* **338**, 227–240 (2009).
- 845 61. H. Somanathan, A. Kelber, R. M. Borges, R. Wallén, E. J. Warrant, Visual ecology of Indian  
846 carpenter bees II: adaptations of eyes and ocelli to nocturnal and diurnal lifestyles. *J. Comp. Physiol.*  
847 *A Neuroethol. Sens. Neural Behav. Physiol.* **195**, 571–583 (2009).
- 848 62. A. L. Stöckl, D. O’Carroll, E. J. Warrant, Higher-order neural processing tunes motion neurons to  
849 visual ecology in three species of hawkmoths. *Proceedings of the Royal Society B: Biological*  
850 *Sciences* **284**, 20170880 (2017).
- 851 63. I. Shimizu, Y. Yamakawa, Y. Shimazaki, T. Iwasa, Molecular cloning of *Bombyx* cerebral opsin  
852 (*Boceropsin*) and cellular localization of its expression in the silkworm brain. *Biochem. Biophys.*  
853 *Res. Commun.* **287**, 27–34 (2001).
- 854 64. K. Moses, M. C. Ellis, G. M. Rubin, The glass gene encodes a zinc-finger protein required by  
855 *Drosophila* photoreceptor cells. *Nature* **340**, 531–536 (1989).
- 856 65. R. Tearle, Tissue specific effects of ommochrome pathway mutations in *Drosophila melanogaster*.  
857 *Genet. Res.* **57**, 257–266 (1991).
- 858 66. H. K. Shamloula, *et al.*, *rugose* (*rg*), a *Drosophila* A kinase anchor protein, is required for retinal  
859 pattern formation and interacts genetically with multiple signaling pathways. *Genetics* **161**, 693–710  
860 (2002).
- 861 67. A. Stöckl, *et al.*, Differential investment in visual and olfactory brain areas reflects behavioural  
862 choices in hawk moths. *Sci. Rep.* **6** (2016).
- 863 68. A. Sourakov, R. W. Chadd, *The Lives of Moths: A Natural History of Our Planet’s Moth Life*  
864 (Princeton University Press, 2022).

- 865 69. A. Y. Kawahara, *et al.*, Phylogenomics reveals the evolutionary timing and pattern of butterflies and  
866 moths. *Proc. Natl. Acad. Sci. U. S. A.* **116**, 22657–22663 (2019).
- 867 70. J. J. Rubin, *et al.*, The evolution of anti-bat sensory illusions in moths. *Science Advances* (2018)  
868 <https://doi.org/10.1126/sciadv.aar7428>.
- 869 71. J. E. Yack, L. D. Otero, J. W. Dawson, A. Surlykke, J. H. Fullard, Sound production and hearing in  
870 the blue cracker butterfly *Hamadryas feronia* (Lepidoptera, nymphalidae) from Venezuela. *J. Exp.*  
871 *Biol.* **203**, 3689–3702 (2000).
- 872 72. J. R. Barber, *et al.*, Anti-bat ultrasound production in moths is globally and phylogenetically  
873 widespread. *Proc. Natl. Acad. Sci. U. S. A.* **119**, e2117485119 (2022).
- 874 73. G. A. Jacobs, J. P. Miller, Z. Aldworth, Computational mechanisms of mechanosensory processing  
875 in the cricket. *J. Exp. Biol.* **211**, 1819–1828 (2008).
- 876 74. J. M. Camhi, Locust wind receptors: I. Transducer mechanics and sensory response. *J. Exp. Biol.* **50**,  
877 335–348 (1969).
- 878 75. J. M. Camhi, Locust wind receptors. 3. Contribution to flight initiation and lift control. *J. Exp. Biol.*  
879 **50**, 363–373 (1969).
- 880 76. J. C. Tuthill, R. I. Wilson, Mechanosensation and Adaptive Motor Control in Insects. *Curr. Biol.* **26**,  
881 R1022–R1038 (2016).
- 882 77. J. D. Baker, S. Adhikarakunnathu, M. J. Kernan, Mechanosensory-defective, male-sterile unc  
883 mutants identify a novel basal body protein required for ciliogenesis in *Drosophila*. *Development*  
884 **131**, 3411–3422 (2004).
- 885 78. D. D. Dell’Aglia, W. O. McMillan, S. H. Montgomery, Shifting balances in the weighting of sensory  
886 modalities are predicted by divergence in brain morphology in incipient species of *Heliconius*  
887 butterflies. *Anim. Behav.* **185**, 83–90 (2022).
- 888 79. S. H. Montgomery, R. M. Merrill, S. R. Ott, Brain composition in *Heliconius* butterflies,  
889 posteclosion growth and experience-dependent neuropil plasticity. *J. Comp. Neurol.* **524**, 1747–1769  
890 (2016).
- 891 80. S. Anton, W. Rössler, Plasticity and modulation of olfactory circuits in insects. *Cell Tissue Res.* **383**,  
892 149–164 (2021).
- 893 81. S. Halali, *et al.*, Predictability of temporal variation in climate and the evolution of seasonal  
894 polyphenism in tropical butterfly communities. *J. Evol. Biol.* **34**, 1362–1375 (2021).
- 895 82. W. Kuenzinger, *et al.*, Innate colour preferences of a hawkmoth depend on visual context. *Biol. Lett.*  
896 **15**, 20180886 (2019).
- 897 83. A. Kelber, Pattern discrimination in a hawkmoth: innate preferences, learning performance and  
898 ecology. *Proc. Biol. Sci.* **269**, 2573–2577 (2002).

- 899 84. G. T. Broadhead, T. Basu, M. von Arx, R. A. Raguso, Diel rhythms and sex differences in the  
900 locomotor activity of hawkmoths. *J. Exp. Biol.* **220**, 1472–1480 (2017).
- 901 85. M. Bischoff, R. A. Raguso, A. Jürgens, D. R. Campbell, Context-dependent reproductive isolation  
902 mediated by floral scent and color. *Evolution* **69**, 1–13 (2015).
- 903 86. S. Jaeger, C. Girvin, N. Demarest, E. LoPresti, Secondary pollinators contribute to reproductive  
904 success of a pink-flowered sand verbena population. *Ecology* **104**, e3977 (2023).
- 905 87. W. V. So, *et al.*, takeout, a novel *Drosophila* gene under circadian clock transcriptional regulation.  
906 *Mol. Cell. Biol.* **20**, 6935–6944 (2000).
- 907 88. T. Kikawada, *et al.*, Trehalose transporter 1, a facilitated and high-capacity trehalose transporter,  
908 allows exogenous trehalose uptake into cells. *Proc. Natl. Acad. Sci. U. S. A.* **104**, 11585–11590  
909 (2007).
- 910 89. H. Steller, K. F. Fischbach, G. M. Rubin, Disconnected: a locus required for neuronal pathway  
911 formation in the visual system of *Drosophila*. *Cell* **50**, 1139–1153 (1987).
- 912 90. C. Helfrich-Förster, Robust circadian rhythmicity of *Drosophila melanogaster* requires the presence  
913 of lateral neurons: a brain-behavioral study of disconnected mutants. *J. Comp. Physiol. A* **182**, 435–  
914 453 (1998).
- 915 91. L. R. Sanders, M. Patel, J. W. Mahaffey, The *Drosophila* gap gene giant has an anterior segment  
916 identity function mediated through disconnected and teashirt. *Genetics* **179**, 441–453 (2008).
- 917 92. E. Blanchardon, *et al.*, Defining the role of *Drosophila* lateral neurons in the control of circadian  
918 rhythms in motor activity and eclosion by targeted genetic ablation and PERIOD protein  
919 overexpression. *Eur. J. Neurosci.* **13**, 871–888 (2001).
- 920 93. A. D. Keller, T. Maniatis, Only two of the five zinc fingers of the eukaryotic transcriptional  
921 repressor PRDI-BF1 are required for sequence-specific DNA binding. *Mol. Cell. Biol.* **12**, 1940–  
922 1949 (1992).
- 923 94. S. Johnson, N. Boob, A strange pair. *News of the Lepidopterists' Society* **55**, 116 (2013).
- 924 95. C. J. van der Kooi, D. G. Stavenga, K. Arikawa, G. Belušič, A. Kelber, Evolution of Insect Color  
925 Vision: From Spectral Sensitivity to Visual Ecology. *Annu. Rev. Entomol.* **66**, 435–461 (2021).
- 926 96. M. Martin, Cutadapt removes adapter sequences from high-throughput sequencing reads.  
927 *EMBnet.journal* **17**, 10–12 (2011).
- 928 97. M. G. Grabherr, *et al.*, Full-length transcriptome assembly from RNA-Seq data without a reference  
929 genome. *Nat. Biotechnol.* **29**, 644–652 (2011).
- 930 98. D. R. Zerbino, E. Birney, Velvet: algorithms for de novo short read assembly using de Bruijn graphs.  
931 *Genome Res.* **18**, 821–829 (2008).
- 932 99. G. Robertson, *et al.*, De novo assembly and analysis of RNA-seq data. *Nat. Methods* **7**, 909–912

- 933 (2010).
- 934 100. R. Luo, *et al.*, SOAPdenovo2: an empirically improved memory-efficient short-read de novo  
935 assembler. *Gigascience* **1**, 18 (2012).
- 936 101. D. G. Gilbert, Longest protein, longest transcript or most expression, for accurate gene  
937 reconstruction of transcriptomes? *bioRxiv*, 829184 (2019).
- 938 102. D. Gilbert, Gene-omes built from mRNA seq not genome DNA (2016)  
939 <https://doi.org/10.7490/f1000research.1112594.1> (June 6, 2022).
- 940 103. , <https://github.com/NCGAS/de-novo-transcriptome-assembly-pipeline> (Github) (June 6, 2022).
- 941 104. M. Manni, M. R. Berkeley, M. Seppey, F. A. Simão, E. M. Zdobnov, BUSCO Update: Novel and  
942 Streamlined Workflows along with Broader and Deeper Phylogenetic Coverage for Scoring of  
943 Eukaryotic, Prokaryotic, and Viral Genomes. *Mol. Biol. Evol.* **38**, 4647–4654 (2021).
- 944 105. R. Smith-Unna, C. Boursnell, R. Patro, J. M. Hibberd, S. Kelly, TransRate: reference-free quality  
945 assessment of de novo transcriptome assemblies. *Genome Res.* **26**, 1134–1144 (2016).
- 946 106. A. Mikheenko, A. Prjibelski, V. Saveliev, D. Antipov, A. Gurevich, Versatile genome assembly  
947 evaluation with QUAST-LG. *Bioinformatics* **34**, i142–i150 (2018).
- 948 107. W. Li, A. Godzik, Cd-hit: a fast program for clustering and comparing large sets of protein or  
949 nucleotide sequences. *Bioinformatics* **22**, 1658–1659 (2006).
- 950 108. L. Fu, B. Niu, Z. Zhu, S. Wu, W. Li, CD-HIT: accelerated for clustering the next-generation  
951 sequencing data. *Bioinformatics* **28**, 3150–3152 (2012).
- 952 109. M. Steinegger, J. Söding, MMseqs2 enables sensitive protein sequence searching for the analysis  
953 of massive data sets. *Nat. Biotechnol.* **35**, 1026–1028 (2017).
- 954 110. Gene Ontology Consortium, The Gene Ontology resource: enriching a GOld mine. *Nucleic Acids  
955 Res.* **49**, D325–D334 (2021).
- 956 111. D. M. Bryant, *et al.*, A Tissue-Mapped Axolotl De Novo Transcriptome Enables Identification of  
957 Limb Regeneration Factors. *Cell Rep.* **18**, 762–776 (2017).
- 958 112. R. D. Finn, J. Clements, S. R. Eddy, HMMER web server: interactive sequence similarity  
959 searching. *Nucleic Acids Research* **39**, W29–W37 (2011).
- 960 113. M. Punta, *et al.*, The Pfam protein families database. *Nucleic Acids Res.* **40**, D290–301 (2012).
- 961 114. R. D. Finn, *et al.*, The Pfam protein families database: towards a more sustainable future. *Nucleic  
962 Acids Res.* **44**, D279–85 (2016).
- 963 115. T. N. Petersen, S. Brunak, G. von Heijne, H. Nielsen, SignalP 4.0: discriminating signal peptides  
964 from transmembrane regions. *Nat. Methods* **8**, 785–786 (2011).

- 965 116. A. Krogh, B. Larsson, G. von Heijne, E. L. Sonnhammer, Predicting transmembrane protein  
966 topology with a hidden Markov model: application to complete genomes. *J. Mol. Biol.* **305**, 567–580  
967 (2001).
- 968 117. S. F. Altschul, W. Gish, W. Miller, E. W. Myers, D. J. Lipman, Basic local alignment search tool.  
969 *J. Mol. Biol.* **215**, 403–410 (1990).
- 970 118. M. Kanehisa, S. Goto, Y. Sato, M. Furumichi, M. Tanabe, KEGG for integration and  
971 interpretation of large-scale molecular data sets. *Nucleic Acids Res.* **40**, D109–14 (2012).
- 972 119. M. Ashburner, *et al.*, Gene ontology: tool for the unification of biology. The Gene Ontology  
973 Consortium. *Nat. Genet.* **25**, 25–29 (2000).
- 974 120. S. Powell, *et al.*, eggNOG v3.0: orthologous groups covering 1133 organisms at 41 different  
975 taxonomic ranges. *Nucleic Acids Res.* **40**, D284–9 (2012).
- 976 121. R. Patro, G. Duggal, M. I. Love, R. A. Irizarry, C. Kingsford, Salmon provides fast and bias-  
977 aware quantification of transcript expression. *Nat. Methods* **14**, 417–419 (2017).
- 978 122. M. D. Robinson, D. J. McCarthy, G. K. Smyth, edgeR: a Bioconductor package for differential  
979 expression analysis of digital gene expression data. *Bioinformatics* **26**, 139–140 (2010).
- 980 123. M. I. Love, W. Huber, S. Anders, Moderated estimation of fold change and dispersion for RNA-  
981 seq data with DESeq2. *Genome Biol.* **15**, 550 (2014).
- 982 124. Alexa, Rahnenfuhrer, topGO: Enrichment analysis for Gene Ontology. R package version 2.28. 0.  
983 *Cranio* (2016).
- 984 125. S. X. Ge, D. Jung, R. Yao, ShinyGO: a graphical gene-set enrichment tool for animals and plants.  
985 *Bioinformatics* **36**, 2628–2629 (2020).
- 986 126. P. Langfelder, S. Horvath, Fast R Functions for Robust Correlations and Hierarchical Clustering.  
987 *J. Stat. Softw.* **46** (2012).
- 988 127. Y. Mei, *et al.*, InsectBase 2.0: a comprehensive gene resource for insects. *Nucleic Acids Res.* **50**,  
989 D1040–D1045 (2022).
- 990 128. J. Jumper, *et al.*, Highly accurate protein structure prediction with AlphaFold. *Nature* **596**, 583–  
991 589 (2021).
- 992 129. V. Mariani, M. Biasini, A. Barbato, T. Schwede, IDDT: a local superposition-free score for  
993 comparing protein structures and models using distance difference tests. *Bioinformatics* **29**, 2722–  
994 2728 (2013).
- 995 130. B. Yariv, *et al.*, Using evolutionary data to make sense of macromolecules with a “face-lifted”  
996 ConSurf. *Protein Sci.* **32**, e4582 (2023).
- 997 131. H. Ashkenazy, *et al.*, ConSurf 2016: an improved methodology to estimate and visualize  
998 evolutionary conservation in macromolecules. *Nucleic Acids Res.* **44**, W344–50 (2016).

- 999 132. G. Celniker, *et al.*, ConSurf: Using evolutionary data to raise testable hypotheses about protein  
1000 function. *Isr. J. Chem.* **53**, 199–206 (2013).
- 1001 133. H. Ashkenazy, E. Erez, E. Martz, T. Pupko, N. Ben-Tal, ConSurf 2010: calculating evolutionary  
1002 conservation in sequence and structure of proteins and nucleic acids. *Nucleic Acids Res.* **38**, W529–  
1003 33 (2010).
- 1004 134. M. Landau, *et al.*, ConSurf 2005: the projection of evolutionary conservation scores of residues  
1005 on protein structures. *Nucleic Acids Res.* **33**, W299–302 (2005).
- 1006 135. Schrödinger, LLC, The PyMOL Molecular Graphics System, Version 1.8 (2015).
- 1007 136. N. Blom, S. Gammeltoft, S. Brunak, Sequence and structure-based prediction of eukaryotic  
1008 protein phosphorylation sites. *J. Mol. Biol.* **294**, 1351–1362 (1999).
- 1009 137. N. Blom, T. Sicheritz-Pontén, R. Gupta, S. Gammeltoft, S. Brunak, Prediction of post-  
1010 translational glycosylation and phosphorylation of proteins from the amino acid sequence.  
1011 *Proteomics* **4**, 1633–1649 (2004).

1012

1013

1014

1015

1016

1017

1018

1019

1020

1021

1022

1023

1024

1025

1026

1027

1028

1029

1030

1031 **Supplemental Figures**

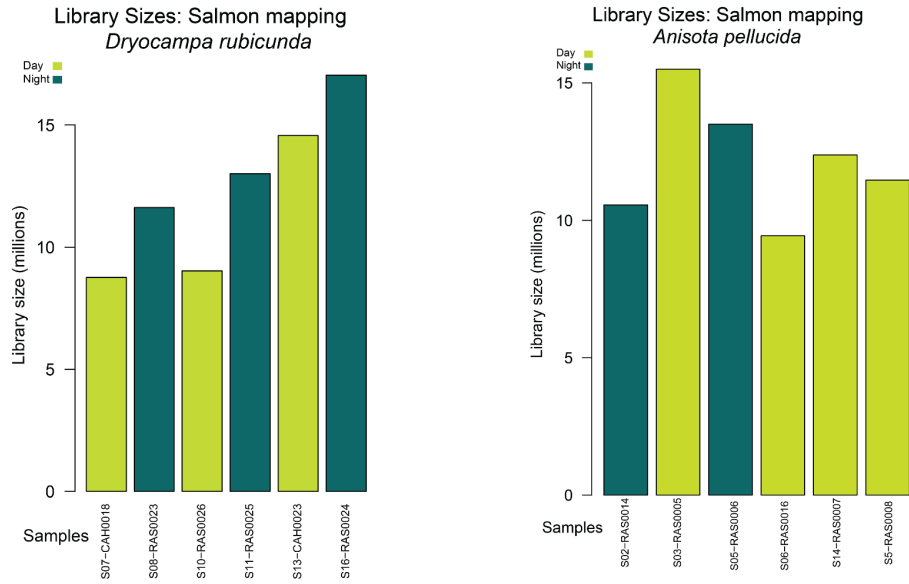

1032  
1033  
1034  
1035

**Figure S1:** Variation in salmon mapped libraries for *Dryocampa rubicunda* and *Anisota pellucida*

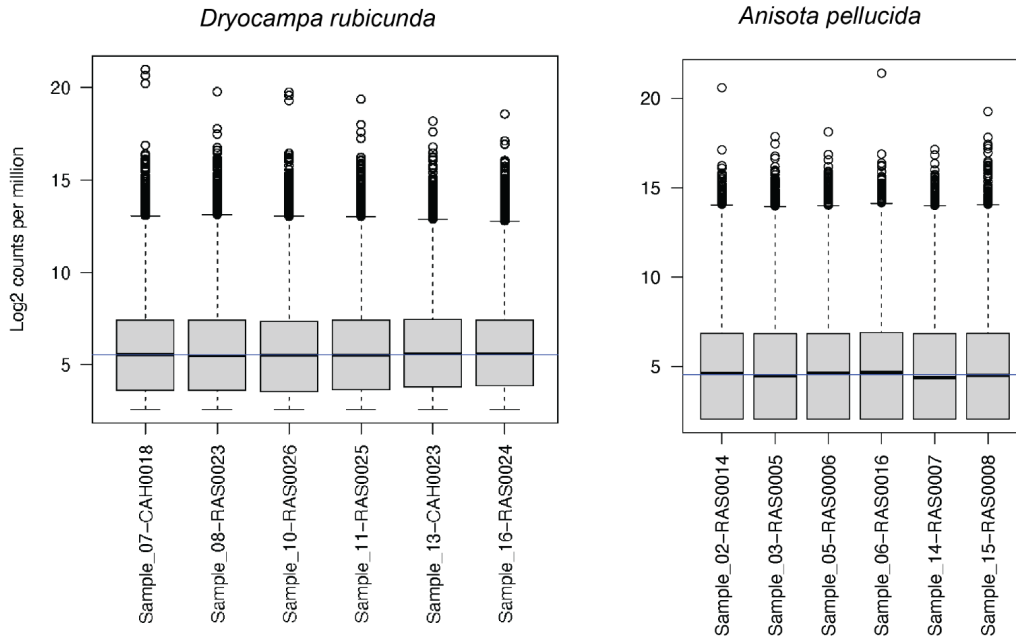

1036  
1037  
1038

**Figure S2:** Variation in normalised libraries for *Dryocampa rubicunda* and *Anisota pellucida*

1039

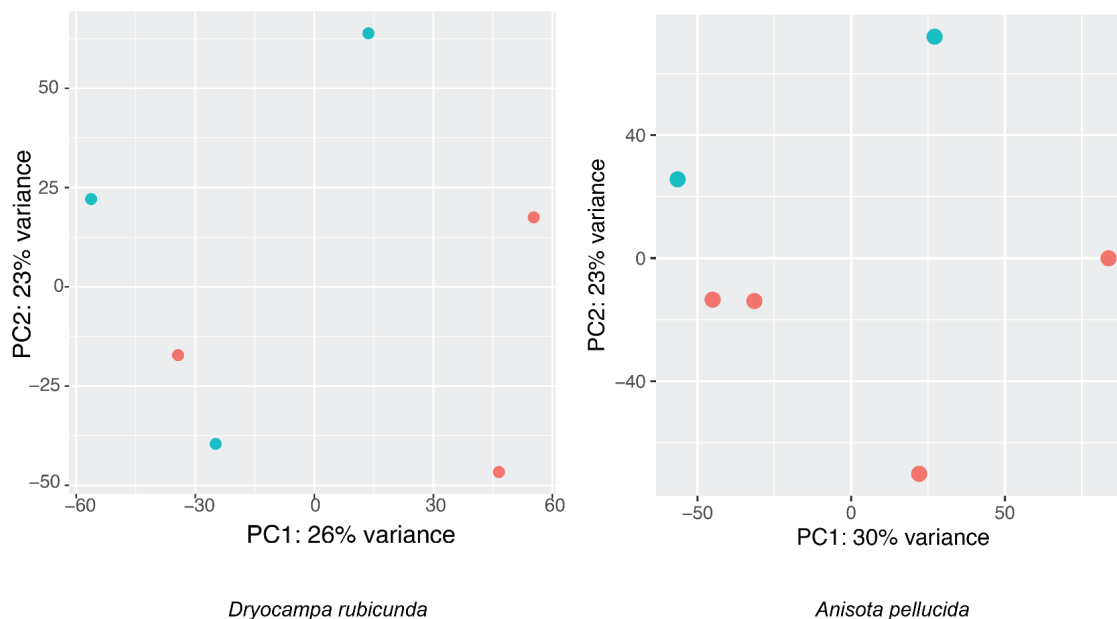

1040

1041 **Figure S3:** PC1 and PC2 of libraries labelled for *Dryocampa rubicunda* and *Anisota pellucida*.

1042 Orange and blue labels refer to midday 'Day' and midnight 'Night' collection time points,

1043 respectively. This PCA was generated from mapped salmon reads after normalising with DESeq2.

1044



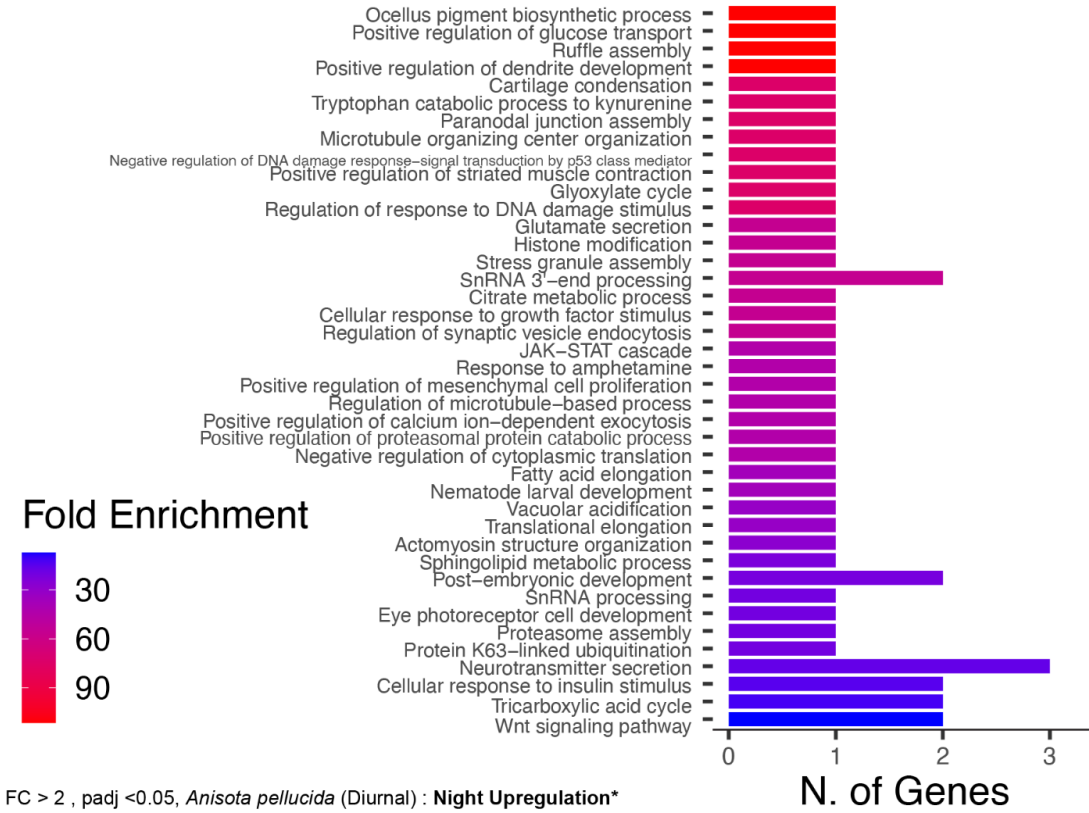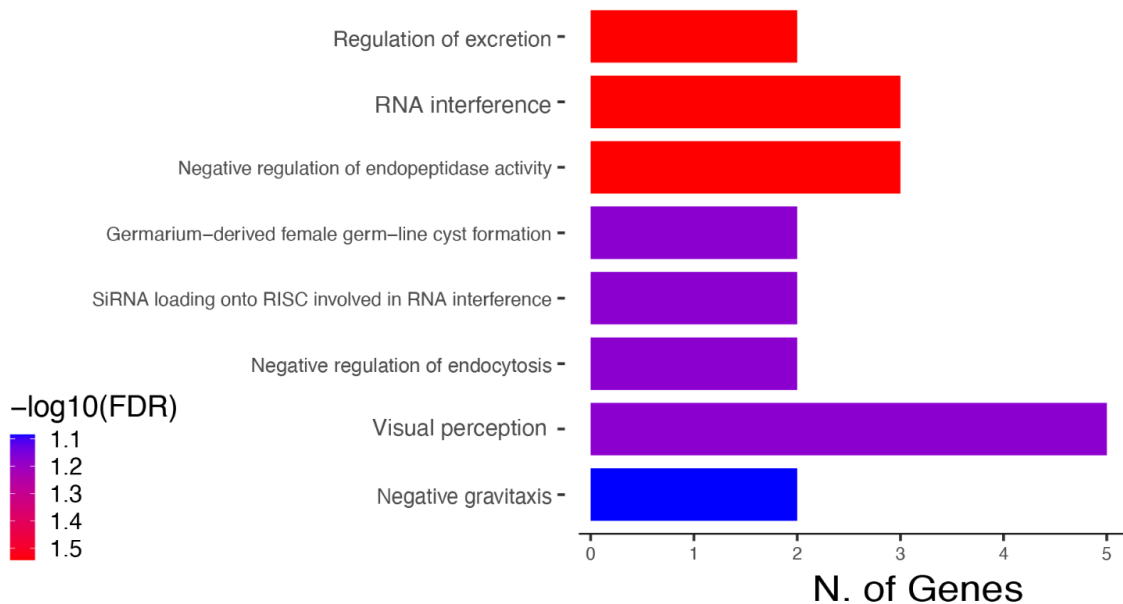

1046  
1047 **Figure S4:** Enriched lists of GO terms associated with significant positively and negatively  
1048 expressed genes recovered from 2 or more analyses (DESeq2, WGCNA, EdgeR) for *Anisota*  
1049 *pellucida*. ShinyGo was used to highlight terms with genes showing representation compared to the  
1050 background of detectable genes values representing ShinyGo overrepresentation. Top: Enriched Day  
1051 Upregulated genes (FDR>0.1) with gene expression FC>=2, adjusted p-value <0.05. Bottom:  
1052 Enriched Night Upregulated genes (FDR>0.1) with gene expression FC<=2, adjusted p-value <0.05  
1053 and that showed at least 2 occurrences in the combined dataset. Values are sorted by -log FDR  
1054 \*Genes that showed up in at least 2 separate analyses are included, (>=2 occurrences in the combined  
1055 dataset). The background used was all transcripts that were recovered in the DEG analysis and had  
1056 *Bombyx* orthologs

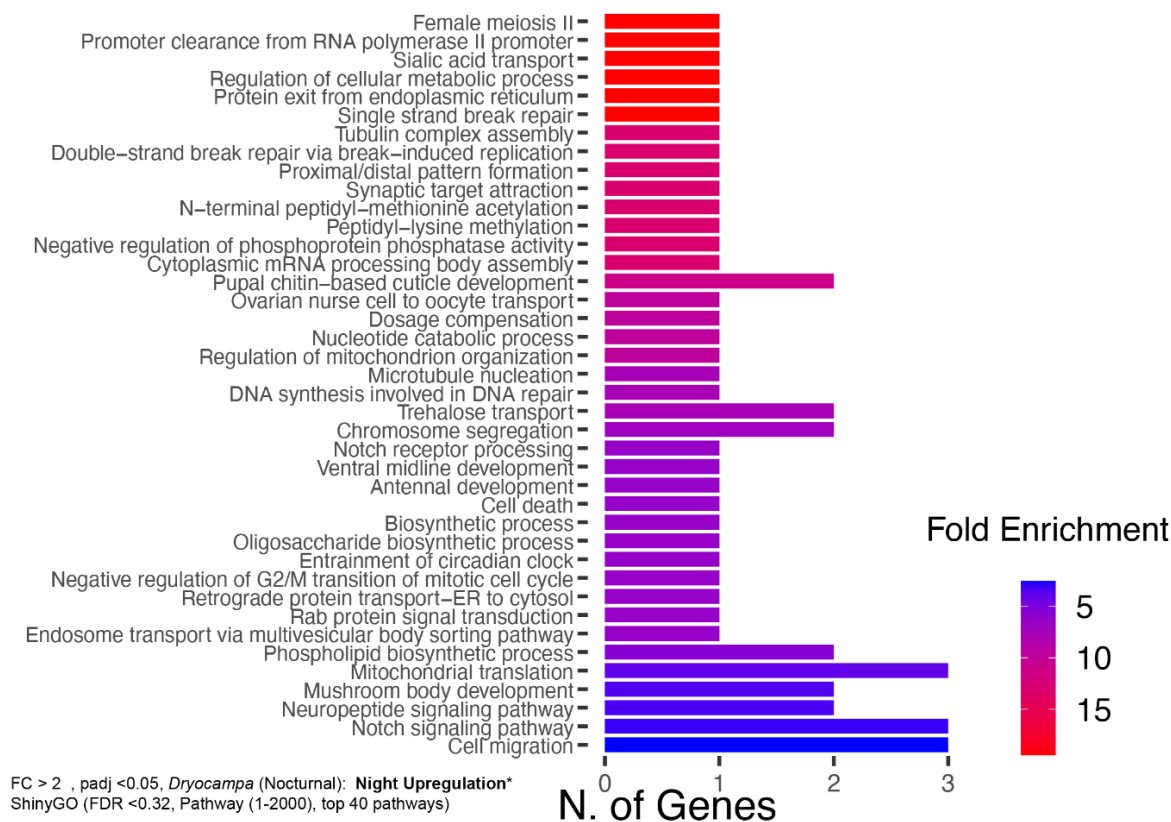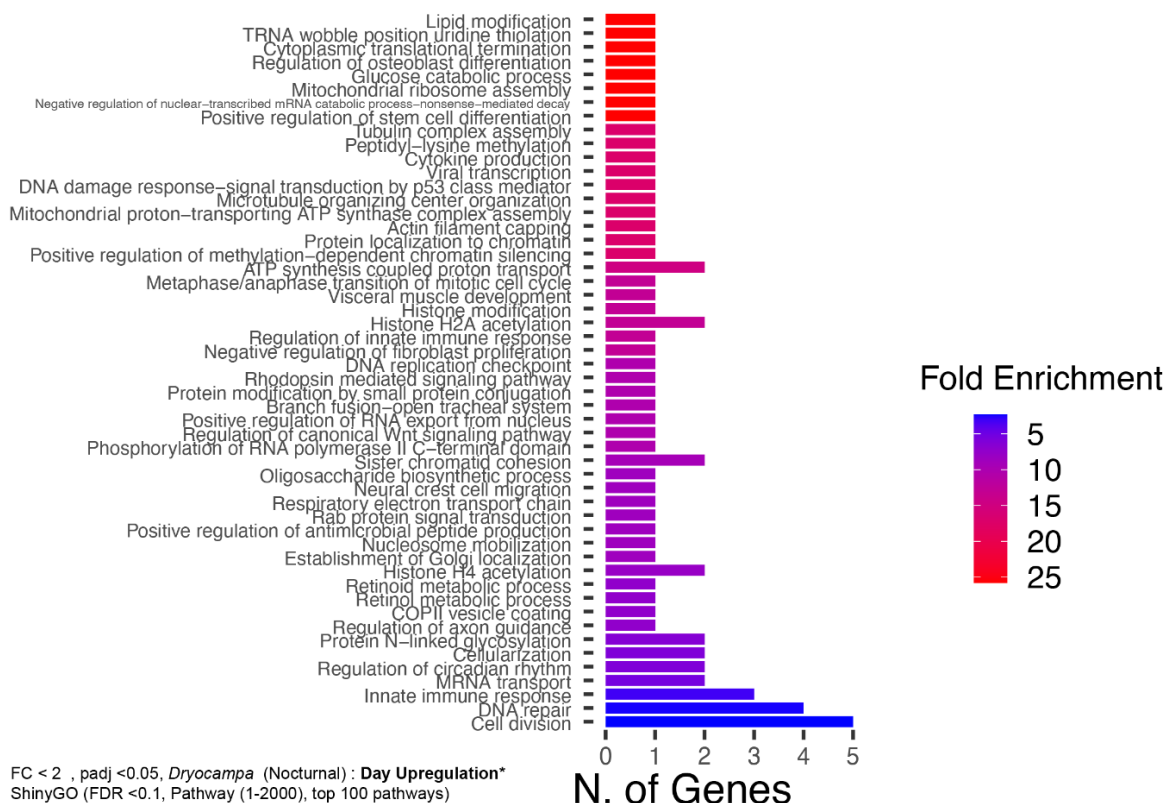

1058 **Figure S5** : Enriched lists of GO terms associated with significant positively and negatively  
1059 expressed genes recovered from 2 or more analyses (DESeq2, WGCNA, EdgeR) for *Dryocampa*  
1060 *rubicunda* . ShinyGo was used to highlight terms with genes showing representation compared to the  
1061 background of detectable genes values representing ShinyGo overrepresentation. Top: Enriched Day  
1062 Top 40 upregulated genes (FDR>0.32) with gene expression FC>=2, adjusted p-value <0.05, 77  
1063 terms enriched , but not all are displayed, see supplementary material for entire list. Bottom:  
1064 Enriched Night Upregulated genes (FDR>0.3) with gene expression FC<=2, adjusted p-value <0.05  
1065 and that showed at least 2 occurrences in the combined dataset \*Genes that showed up in at least 2  
1066 separate analyses are included, (>=2 occurrences in the combined dataset). The background used was  
1067 all transcripts that were recovered in the DEG analysis and had *Bombyx* orthologs

1068  
1069  
1070  
1071  
1072  
1073

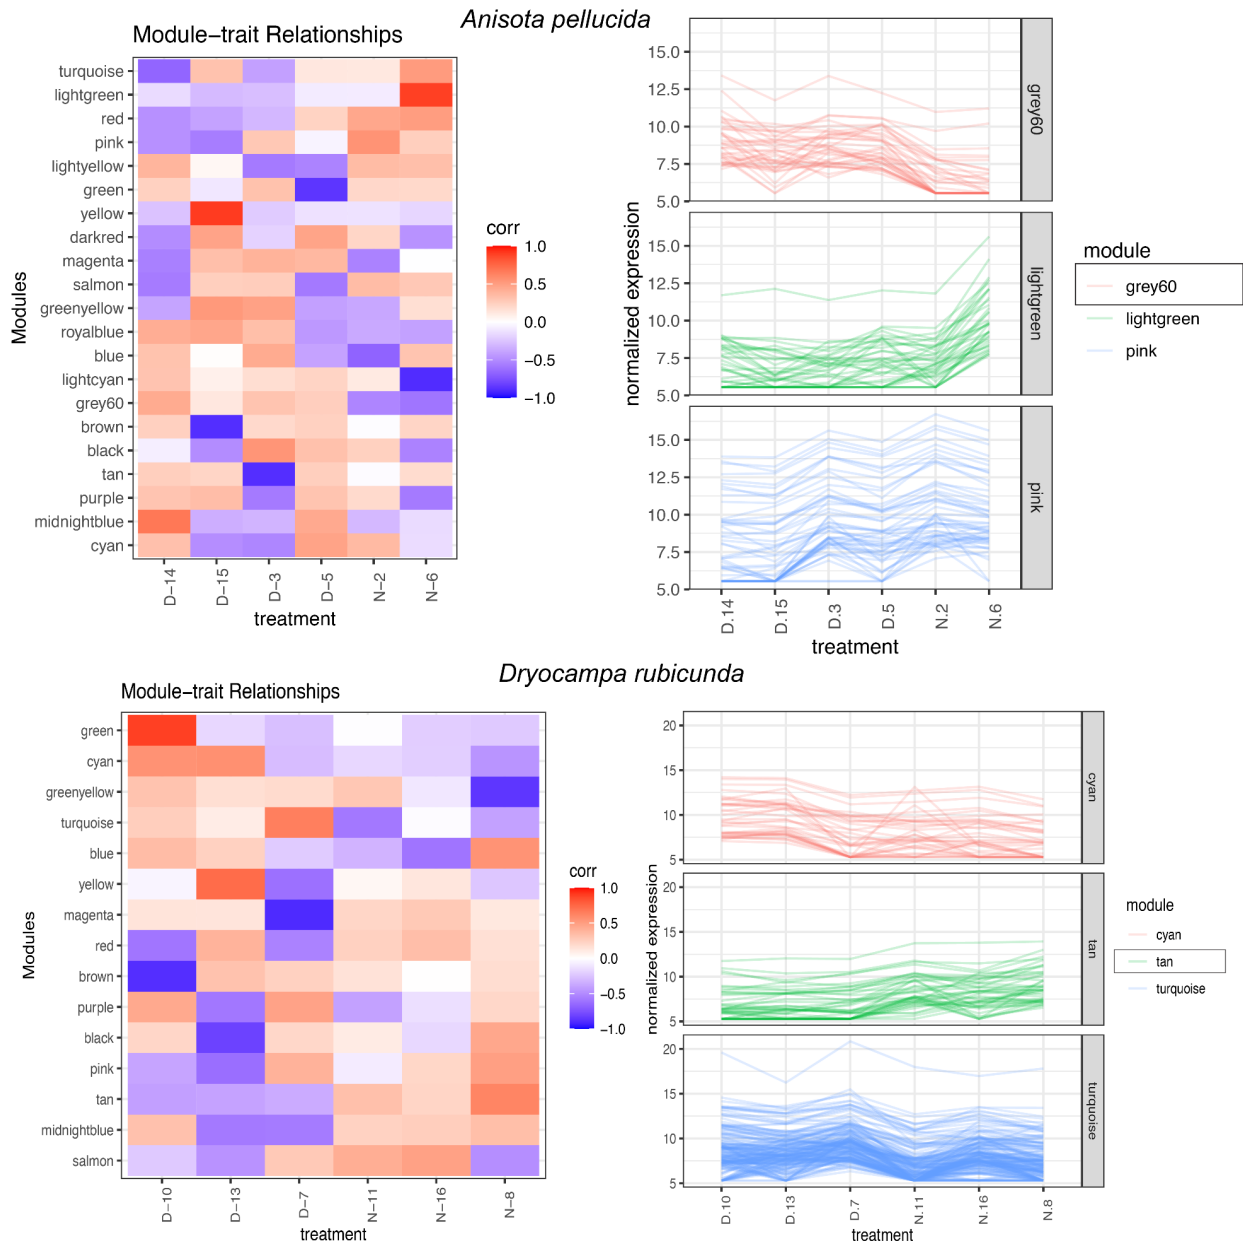

1074  
1075  
1076  
1077  
1078  
1079  
1080

**Figure S6:** Modules of clustered genes grouped using normalized expression for *Anisota pellucida* (top) and *Dryocampa rubicunda* (bottom) Grey60 (38 genes) and Tan (32 genes) modules show species- time of day linked patterns. Left: Shows how patterns of gene expression correlate across samples for modules Right: Shows the normalized expression for all. Normalization was done with DESeq2 and reads were mapped to the more stringently filtered transcriptome. A soft power analysis was done and the picked power=9 for the WGCNA analysis.

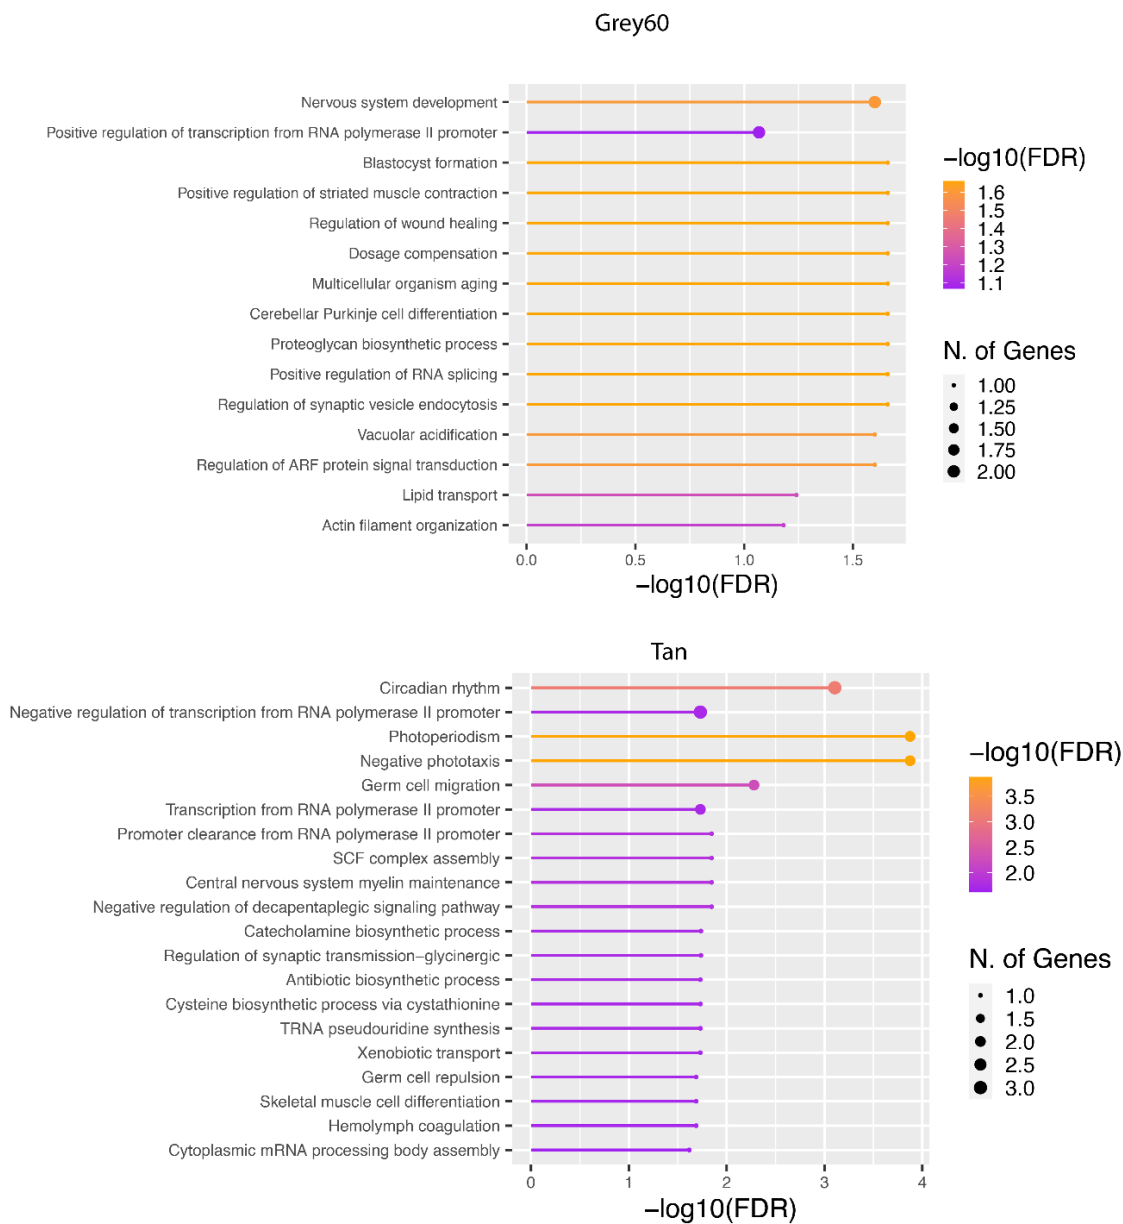

1081

1082

1083

1084

**Figure S7:** Shiny Go enrichment for Modules of clustered genes grouped using normalized expression for *Anisota pellucida* (top) and *Dryocampa rubicunda* (bottom) Grey60 and Tan.

1085

Background used was all *Bombyx mori* genes and FDR cut-off =0.1 min pathway =1 and GO

1086

Biological processes are displayed.

1087

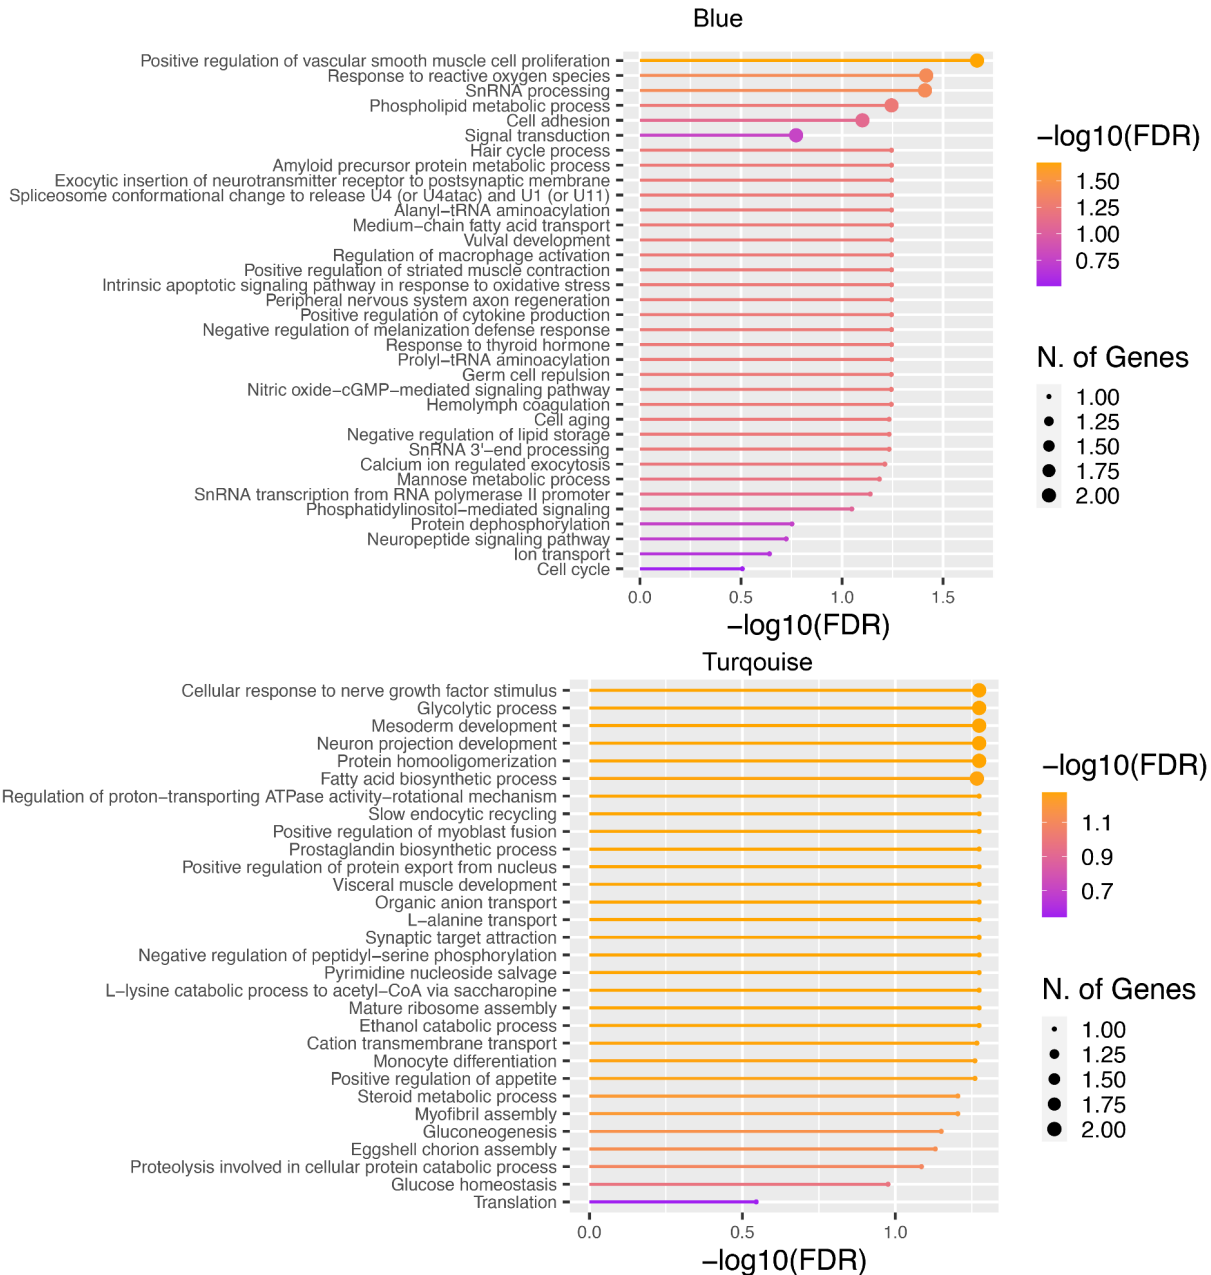

1088

1089 **Figure S8:** Shiny Go enrichment for Modules of clustered genes grouped using normalized  
 1090 expression for combined overlapping reads for the two species (Top) Blue and (Bottom) Turquoise.  
 1091 Background used was all *Bombyx mori* genes and FDR cut-off =1 min pathway =1 and GO  
 1092 Biological processes are displayed.

1093

1094

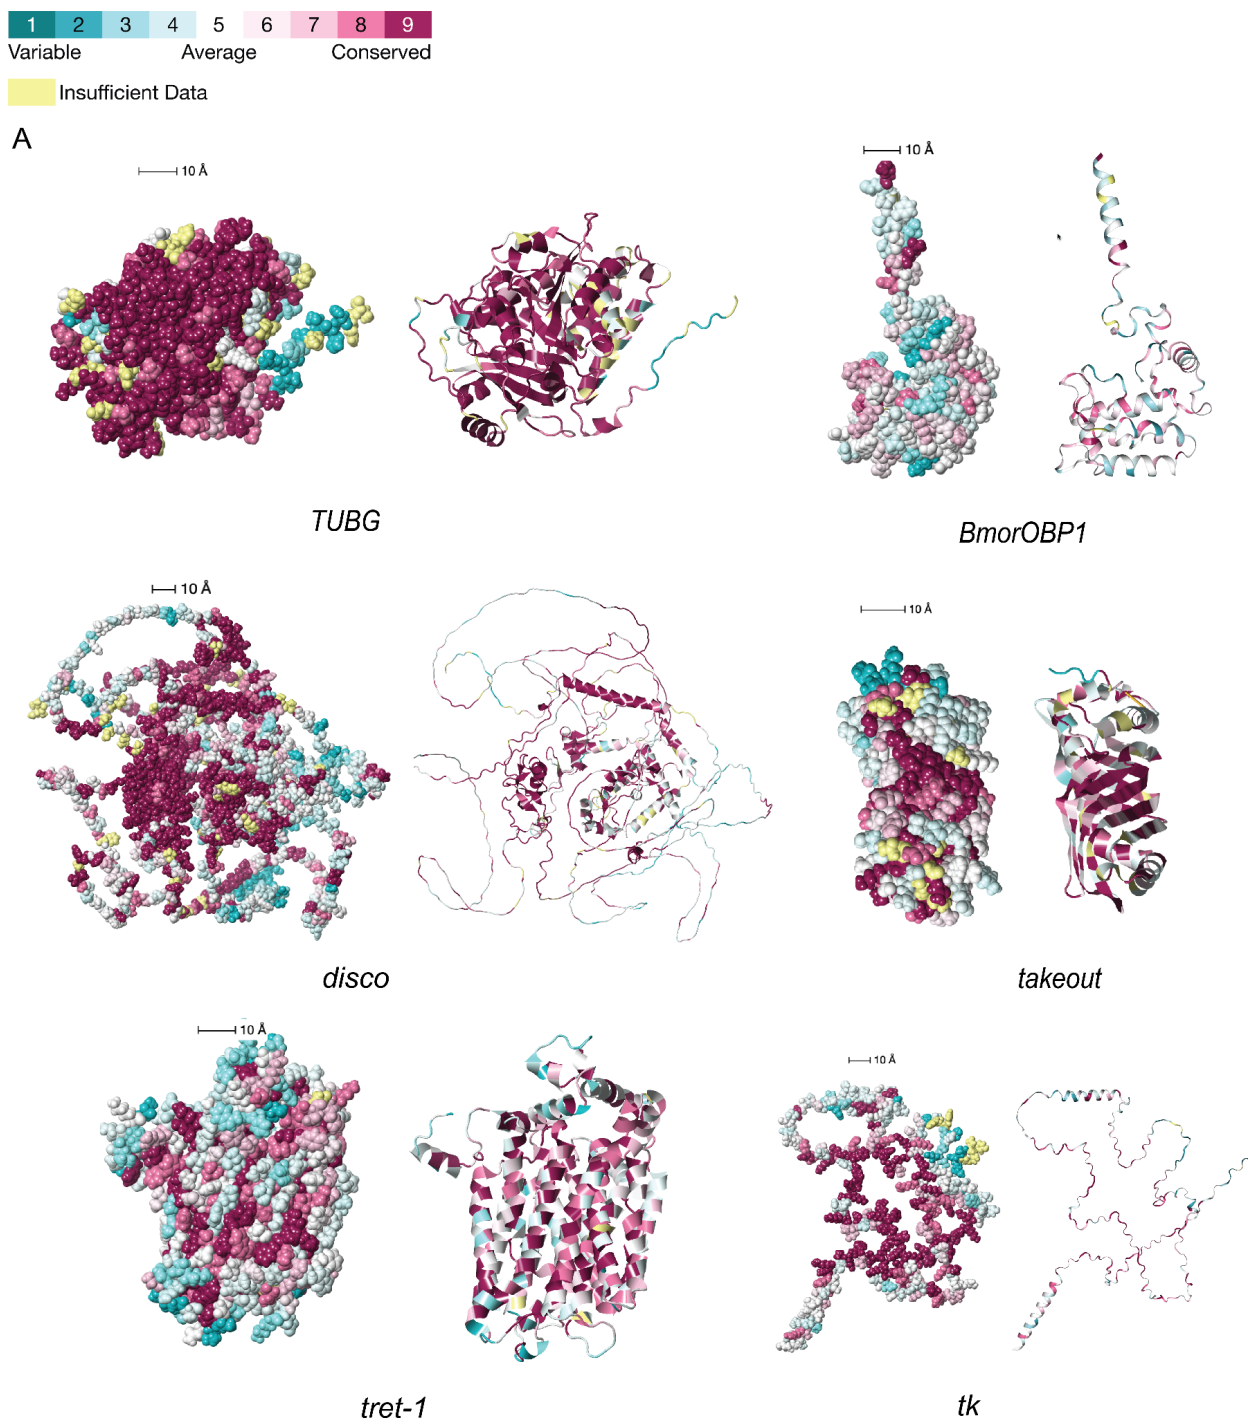

1095  
 1096 **Figure S9:** Variation in structural conservation across moths for predicted proteins for genes of interest.  
 1097 Structures were obtained using AlphaFold predictions of *Bombyx mori* homologs. Left: Space filling  
 1098 models, Right cartoon models, colors represent conservation across the alignment from or  
 1099 Bombycoidea and related moth species. Conservation scores were calculated and mapped onto the



1100 alpha fold structures using the Consurf (131) web server (For other proteins, see Supplementary data)

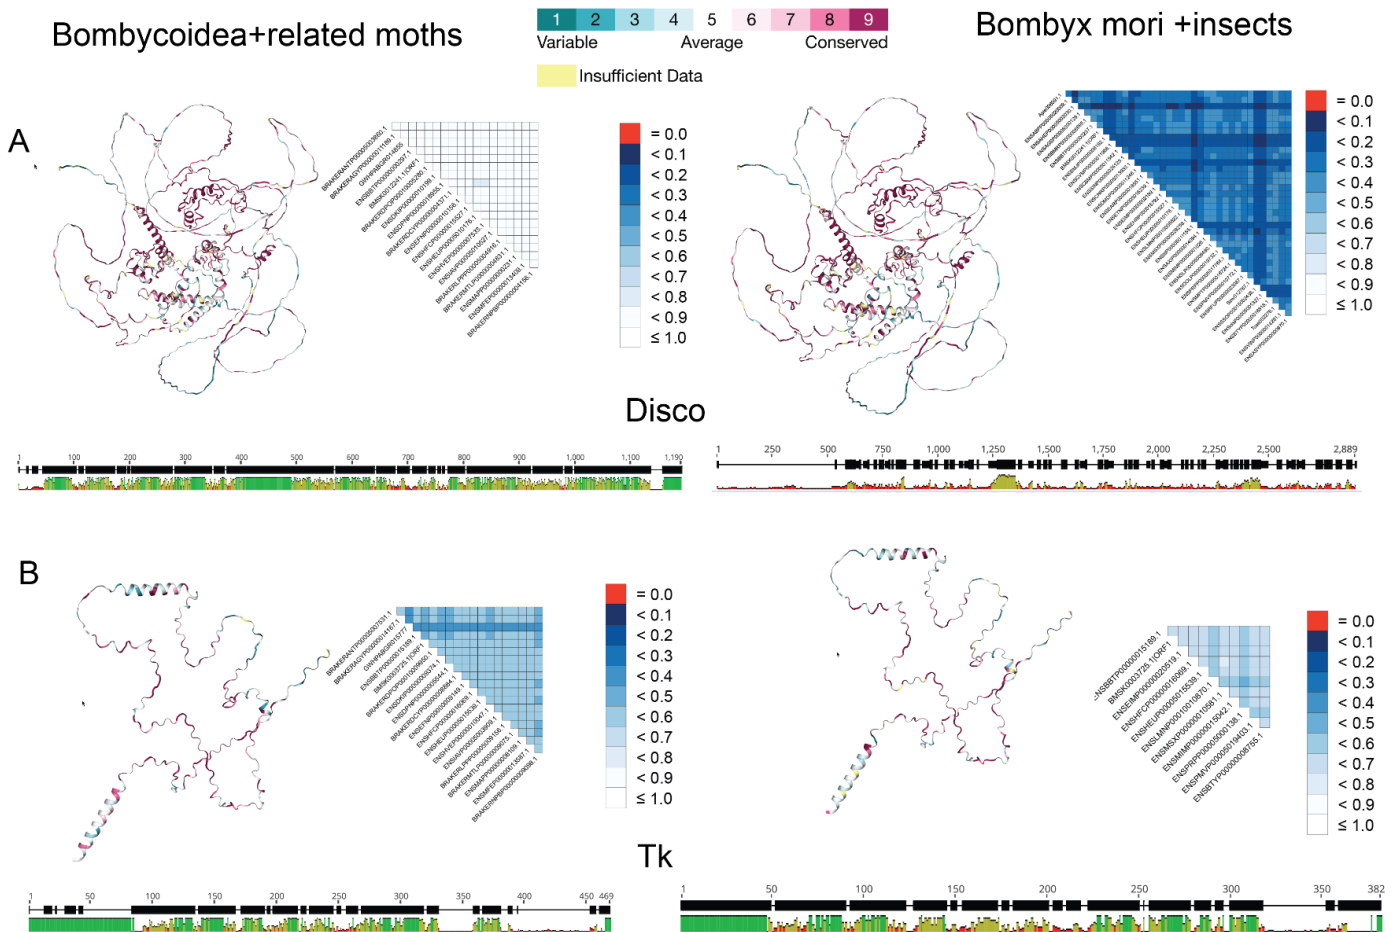

1101  
 1102 **Figure S10:** Illustration of conservation across the alignments and structure for (A) *disco* and (B) *tk*  
 1103 across Bombycoidea and relatives (Left) and insects (Right). Each inset contains the *Consurf* mapped  
 1104 pdb structures on the left. The *alostat* pairwise sequence conservation in the alignment scores on the  
 1105 right and the consensus of the protein alignments were visualized using *Geneious*. For conservation  
 1106 scores for other genes and lists of the species used for this modelling, see Supplementary Tales  
 1107 (Supp. Table: 5-7). Supplementary Dataset 10 has the associated models and output from the  
 1108 analyses.

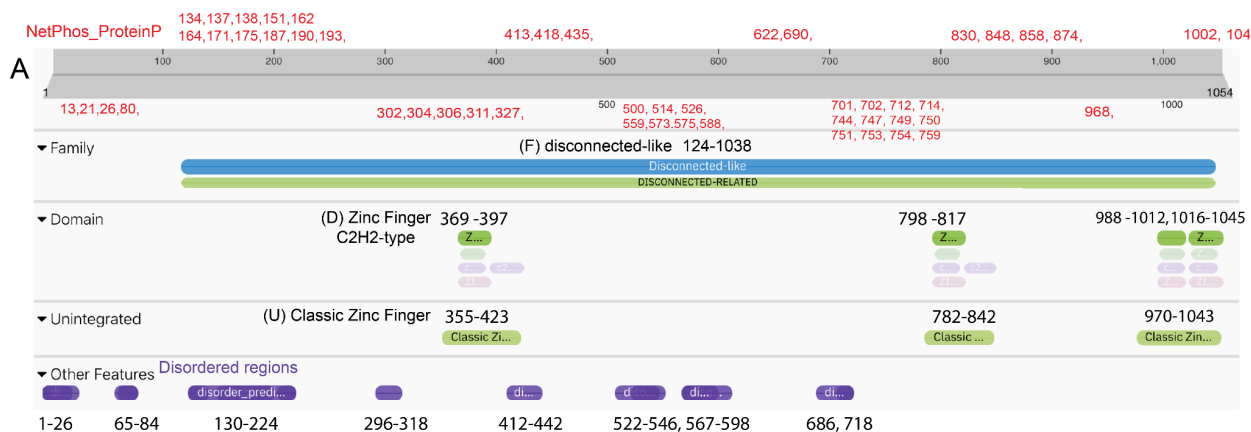

**F** IPR040436: Protein disconnected-like  
PTHR15021: DISCONNECTED-RELATED

**D** IPR013087: Zinc finger C2H2-type  
PS00028: Zinc finger C2H2 type domain signature.  
SM00355: c2h2final6  
PS50157: Zinc finger C2H2 type domain profile.

**U** G3DSA:3.30.160.60: Classic Zinc Finger

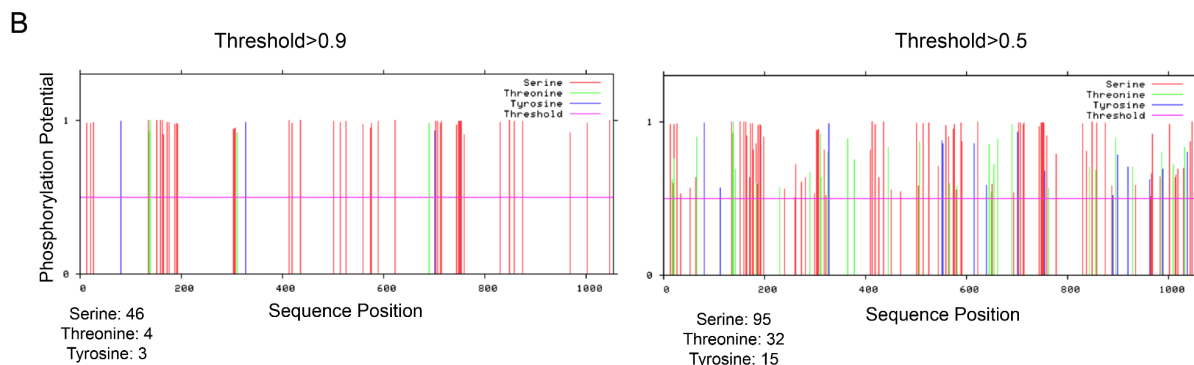

1109  
1110 **Figure S11:** InterPro and NetPhos predictions for *B. mori disco* protein. **(A)** InterPro predicted  
1111 several zinc finger domains, disordered regions and disco and disco-related families. The numbers in  
1112 black highlight the regions for the predicted domain and the numbers in red list the NetPhos  
1113 predicted phosphorylated sites (threshold > 0.9). **(B)** An overall distribution of the predicted  
1114 phosphorylated sites with different thresholds (Left, Threshold = 0.9, Right Threshold = 0.5)  
1115  
1116

### A Takeout UniProt blastp hits with *B. mori*

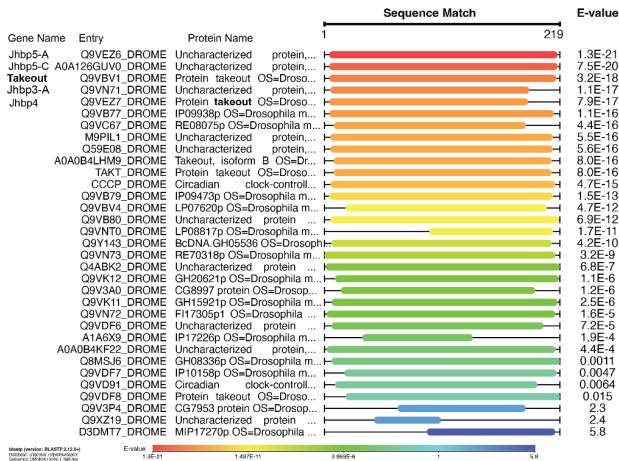

### Takeout FlyBase blastp hits with *B. mori*

| BLAST Hit Summary |         |         |             |
|-------------------|---------|---------|-------------|
| Description       | Species | Score   | E value     |
| Jhbp5-PB          | Dmel    | 92.8189 | 2.4005e-19  |
| Jhbp5-PA          | Dmel    | 92.8189 | 2.4005e-19  |
| Jhbp5-PC          | Dmel    | 88.1965 | 6.1645e-18  |
| CG11854-PB        | Dmel    | 84.7297 | 6.53718e-17 |
| Jhbp3-PB          | Dmel    | 79.7221 | 2.17431e-15 |
| Jhbp3-PA          | Dmel    | 79.7221 | 2.17431e-15 |
| Jhbp4-PA          | Dmel    | 78.1814 | 5.44405e-15 |
| Jhbp12-PA         | Dmel    | 75.8702 | 2.81695e-14 |
| Jhbp6-PC          | Dmel    | 73.9442 | 1.09757e-13 |
| to-PB             | Dmel    | 73.559  | 1.32977e-13 |
| to-PA             | Dmel    | 73.559  | 1.32977e-13 |
| Jhbp6-PB          | Dmel    | 73.559  | 1.4576e-13  |
| Jhbp11-PC         | Dmel    | 73.1738 | 1.72231e-13 |
| Jhbp11-PB         | Dmel    | 73.1738 | 1.72231e-13 |
| dyw-PA            | Dmel    | 71.633  | 5.13817e-13 |
| CG14259-PA        | Dmel    | 67.781  | 7.23608e-12 |
| Jhbp7-PA          | Dmel    | 65.4698 | 4.35398e-11 |
| Jhbp14-PA         | Dmel    | 61.2326 | 8.34367e-10 |
| CG14258-PA        | Dmel    | 58.9214 | 4.005e-09   |
| Jhbp6-PA          | Dmel    | 58.151  | 6.94645e-09 |
| Jhbp1-PA          | Dmel    | 52.7582 | 2.96758e-07 |
| Jhbp10-PA         | Dmel    | 48.9062 | 3.90935e-06 |
| CG16820-PA        | Dmel    | 48.1358 | 6.186e-06   |
| Jhbp13-PB         | Dmel    | 46.9802 | 1.61484e-05 |
| Jhbp13-PA         | Dmel    | 46.9802 | 1.61484e-05 |

### Takeout Consurf conservation scores

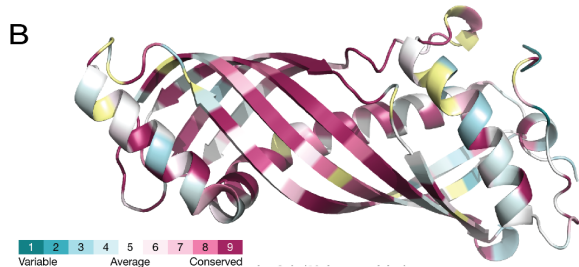

### Takeout protein structure alignment

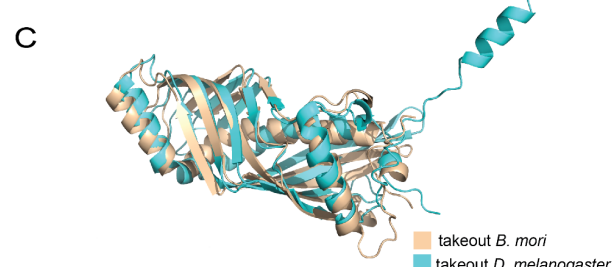

### Takeout protein sequence alignment

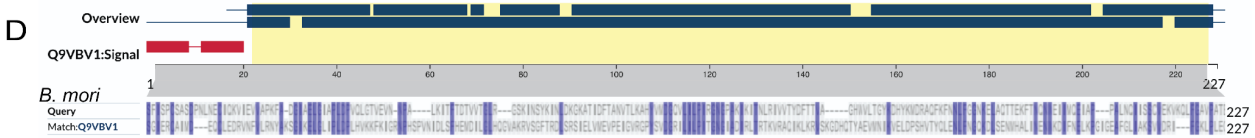

1117 *D. melanogaster*

1118 **Figure S12:** Lack of sequence level conservation in takeout, but high structural overlap

1119 (A) Right: Takeout UniProt blastp hits. (BLOSUM62, filtered for *D. melanogaster*), alignments

1120 =250, e-threshold= 10, database = uniprotkb\_refprot+swissprot, list of illustrative hits is shown. Left:

1121 Similar blastp results from flybase limiting the species to *D. melanogaster*. (B) Consurf predicted

1122 scores for closely related moths mapped on to the *B. mori* takeout predicted protein structure. (C) 3D

1123 structural alignments for fly (*D. melanogaster*) and moth (*B. mori*) takeout 3D models. (D) Uniprot

1124 protein sequence alignment for fly and moth takeout proteins.

1132 **Tables**

1133

| Species                    | Diel-niche | Collection Time | Replicates (n) |
|----------------------------|------------|-----------------|----------------|
| <i>Anisota pellucida</i>   | Diurnal    | Day             | 4              |
|                            |            | Night           | 2              |
| <i>Dryocampa rubicunda</i> | Nocturnal  | Day             | 3              |
|                            |            | Night           | 3              |

1134

1135 **Table 1:** Sampling design showing species, collection time and number of replicates in each  
 1136 treatment. All specimens were male.

1137

| Species | Assembler  | kmer-size | Max- BUSCO groups | Lep BUSCO Score(%) | max-N50    |
|---------|------------|-----------|-------------------|--------------------|------------|
| Ani_pel | Velvet     | 35-85     | 4703 (k55)        | 88                 | 3918 (k55) |
| Ani_pel | Soap       | 35-85     | 4682 (k35)        | 88.5               | 1661 (k35) |
| Ani_pel | Transabyss | 35-85     | 4216 (k35)        | 79                 | 1332 (k35) |
| Ani_pel | Trinity    | 25        | 4948              | 93                 | 1608       |
| Dry_rub | Velvet     | 45-85     | 4768 (k55)        | 90                 | 3957 (k55) |
| Dry_rub | Soap       | 35-85     | 4753 (k35)        | 89                 | 1915 (k75) |
| Dry_rub | Transabyss | 55-85     | 3159 (k55)        | 59                 | 1058 (k55) |
| Dry_rub | Trinity    | 25        | 4939              | 93                 | 1595       |

1138

1139 **Table 2:** Assembly variation using different assemblers and kmer settings.

1140 Key: Dry\_rub: *Dryocampa rubicunda*, Ani\_pel: *Anisota pellucida*. All models included day and  
 1141 night samples.

1142

1143

1144

1145

1146

| Species               | Method | Total DEGs | DEGs (Up) | DEGs (Down) | Annotated DEGs | Unannotated % |
|-----------------------|--------|------------|-----------|-------------|----------------|---------------|
| <i>A. pellucida D</i> | EdgeR  | 350        | 154       | 196         | 211            | 39.71         |
| <i>D. rubicunda N</i> | EdgeR  | 393        | 211       | 182         | 236            | 39.95         |
| <i>A. pellucida D</i> | DESeq2 | 697        | 141       | 556         | 420            | 39.7          |
| <i>D. rubicunda N</i> | DESeq2 | 498        | 253       | 245         | 300            | 39.7          |

1147

1148 **Table 3:** DEG recovery and gene annotation for EdgeR and DESeq2 analyses along with percent  
 1149 annotation using *Bombyx*. Up=FC>2, Implies night expression is greater than day expression.

1150 Down=FC<2, implies day expression is greater (control=Day, Night = Treatment)

1151

| Species | Assembly annotation                | BUSCO score | BUSCO duplication | No. of contigs* | Redundancy (/15k) |
|---------|------------------------------------|-------------|-------------------|-----------------|-------------------|
| Dry_rub | Combined                           | 94.3        | 90.8              | 281790          | 18.8x             |
| Dry_rub | Combined_cds_cdhit_95              | 90.1        | 80.2              | 184808          | 12.3x             |
| Dry_rub | Combined_cds_filtered (v5)         | 85.2        | 59.6              | 41712           | 2.8x              |
| Dry_rub | Combined_cds_stringent_filter (v6) | 75.4        | 4.9               | 19877           | 1.3x              |
| Ani_pel | Combined                           | 94.3        | 90.8              | 281790          | 18.78             |
| Ani_pel | Combined_cds                       | 93.9        | 90.3              | 233097          | 13.3x             |
| Ani_pel | Combined_cds_filtered_cds (v5)     | 85.2        | 59.2              | 41712           | 2.8x              |
| Ani_pel | Combined_cds_stringent_filter (v6) | 79.3        | 4.7               | 19087           | 1.3x              |

1152  
 1153 **Table 4:** BUSCO and contig distribution statistics for different species' *de-novo* assemblies with  
 1154 and without filtering. Increased filtering reduces redundancy and duplication but comes at the  
 1155 cost of reducing BUSCO scores. \*All statistics are based on contigs of size  $\geq$  500 bp.  
 1156

| nGenes | Fold Enrichment | Pathway                                                                       | GO_ID      | Gene Names     |
|--------|-----------------|-------------------------------------------------------------------------------|------------|----------------|
| 2      | 85.53           | Regulation of excretion                                                       | GO:0044062 | NPHS1,SLC9A3R1 |
| 1      | 42.76           | Response to herbicide                                                         | GO:0009635 | Alad           |
| 1      | 42.76           | Carbohydrate catabolic process                                                | GO:0016052 | BMSK0015853    |
| 1      | 42.76           | Blastocyst formation                                                          | GO:0001825 | Actl6a         |
| 1      | 42.76           | Tryptophan catabolic process to kynurenine                                    | GO:0019441 | KFase          |
| 1      | 42.76           | Microvillus assembly                                                          | GO:0030033 | SLC9A3R1       |
| 1      | 42.76           | Parallel actin filament bundle assembly                                       | GO:0030046 | juv            |
| 1      | 42.76           | Heparan sulfate proteoglycan metabolic process                                | GO:0030201 | botv           |
| 1      | 42.76           | Inactivation of MAPK activity                                                 | GO:0000188 | Spred1         |
| 1      | 42.76           | B cell activation                                                             | GO:0042113 | AKAP17A        |
| 1      | 42.76           | Negative regulation of glycogen biosynthetic process                          | GO:0045719 | Gfpt1          |
| 1      | 42.76           | Behavioral response to pain                                                   | GO:0048266 | pain           |
| 1      | 42.76           | Interphase microtubule nucleation by interphase microtubule organizing center | GO:0051415 | Grip91         |
| 1      | 28.51           | Cellular defense response                                                     | GO:0006968 | PNLIPRP2       |
| 1      | 28.51           | Cartilage condensation                                                        | GO:0001502 | COL11A1        |
| 1      | 28.51           | Short-chain fatty acid import                                                 | GO:0015913 | SLC5A8         |
| 1      | 28.51           | Male genitalia development                                                    | GO:0030539 | ken            |
| 1      | 28.51           | Microtubule organizing center organization                                    | GO:0031023 | Gcc2           |
| 1      | 28.51           | Telomere maintenance via semi-conservative replication                        | GO:0032201 | RFC3           |
| 1      | 28.51           | Glomerular basement membrane development                                      | GO:0032836 | NPHS1          |
| 1      | 28.51           | Endosomal vesicle fusion                                                      | GO:0034058 | Ankfy1         |
| 1      | 28.51           | High-density lipoprotein particle assembly                                    | GO:0034380 | ABCA7          |

|   |       |                                                                         |            |                                |
|---|-------|-------------------------------------------------------------------------|------------|--------------------------------|
| 1 | 28.51 | Positive regulation of Rho protein signal transduction                  | GO:0035025 | MCF2L                          |
| 1 | 28.51 | Xenobiotic transport                                                    | GO:0042908 | Mdr49                          |
| 1 | 28.51 | DNA replication-removal of RNA primer                                   | GO:0043137 | Rnaseh1                        |
| 2 | 28.51 | Negative regulation of endocytosis                                      | GO:0045806 | ABCA7,Mctp1                    |
| 2 | 28.51 | <b>Negative gravitaxis</b>                                              | GO:0048060 | pain,pyx                       |
| 1 | 28.51 | Imaginal disc-derived wing expansion                                    | GO:0048526 | Spn88Ea                        |
| 1 | 28.51 | <b>Positive regulation of synapse structural plasticity</b>             | GO:0051835 | FRMPD4                         |
| 1 | 28.51 | Chitin biosynthetic process                                             | GO:0006031 | chs-2                          |
| 2 | 19.01 | Lysosomal transport                                                     | GO:0007041 | Vps53,g                        |
| 2 | 19.01 | RNA interference                                                        | GO:0016246 | Dcr-1,bel                      |
| 2 | 15.55 | Negative regulation of endopeptidase activity                           | GO:0010951 | Spn88Ea,Serpinb1a              |
| 2 | 13.16 | Formation of cytoplasmic translation initiation complex                 | GO:0001732 | eIF3-S5, BMSK0008517           |
| 2 | 10.69 | Protein heterotetramerization                                           | GO:0051290 | pyx,Agrn                       |
| 2 | 10.06 | <b>Positive regulation of synaptic growth at neuromuscular junction</b> | GO:0045887 | Agrn,Sin1                      |
| 2 | 8.55  | Endoplasmic reticulum organization                                      | GO:0007029 | atl,Lman1                      |
| 2 | 7.78  | <b>Regulation of synaptic growth at neuromuscular junction</b>          | GO:0008582 | atl,hiw                        |
| 2 | 7.13  | Negative regulation of cell migration                                   | GO:0030336 | SLC9A3R1,Mctp1                 |
| 5 | 5.94  | <b>Visual perception</b>                                                | GO:0007601 | RDH11,COL11A1, OP1,WDR36,disco |

1157

1158 **Table 5:** Top significantly enriched GO terms for *A. pellucida* day upregulation

1159

| No. Genes | Fold Enrichment | Pathway                                                | GO_ID             | Gene Names     |
|-----------|-----------------|--------------------------------------------------------|-------------------|----------------|
| 1         | 41.61           | Female meiosis II                                      | GO:0007147        | polo           |
| 1         | 41.61           | Female germline ring canal formation-actin assembly    | GO:0008302        | Src64B         |
| 1         | 41.61           | Dosage compensation by hyperactivation of X chromosome | GO:0009047        | mle            |
| 1         | 41.61           | 10-formyltetrahydrofolate catabolic process            | GO:0009258        | aldh111        |
| 1         | 41.61           | <b>Sialic acid transport</b>                           | <b>GO:0015739</b> | <b>SLC17A5</b> |

|   |       |                                                                                         |                   |              |
|---|-------|-----------------------------------------------------------------------------------------|-------------------|--------------|
| 1 | 41.61 | Arachidonic acid metabolic process                                                      | GO:0019369        | FAAH2        |
| 1 | 41.61 | Regulation of cellular metabolic process                                                | GO:0031323        | melt         |
| 1 | 41.61 | Protein exit from endoplasmic reticulum                                                 | GO:0032527        | SEC16A       |
| 1 | 41.61 | Single strand break repair                                                              | GO:0000012        | gkt          |
| 1 | 41.61 | Ring gland development                                                                  | GO:0035271        | gl           |
| 1 | 41.61 | Notch receptor processing-ligand-dependent                                              | GO:0035333        | Nct          |
| 1 | 41.61 | Positive regulation of RNA polymerase II transcriptional preinitiation complex assembly | GO:0045899        | PSMC6        |
| 1 | 41.61 | Tetrahydrofolate metabolic process                                                      | GO:0046653        | MTHFS        |
| 1 | 41.61 | Neurotrophin TRK receptor signaling pathway                                             | GO:0048011        | Bcar1        |
| 1 | 41.61 | Glucose catabolic process                                                               | GO:0006007        | agp          |
| 1 | 41.61 | GlutaminyI-tRNA <sup>Gln</sup> biosynthesis via transamidation                          | GO:0070681        | gatA         |
| 1 | 41.61 | Error-free translesion synthesis                                                        | GO:0070987        | POLH         |
| 1 | 41.61 | Protein deubiquitination involved in ubiquitin-dependent protein catabolic process      | GO:0071947        | trbd         |
| 1 | 41.61 | Negative regulation of release of cytochrome c from mitochondria                        | GO:0090201        | Parl         |
| 1 | 41.61 | Regulation of cardiac conduction                                                        | GO:1903779        | nkx-2.5      |
| 1 | 41.61 | Methionyl-tRNA aminoacylation                                                           | GO:0006431        | MetRS-m      |
| 2 | 33.29 | Tetrahydrofolate interconversion                                                        | GO:0035999        | Sardh,MTHFS  |
| 1 | 27.74 | Tubulin complex assembly                                                                | GO:0007021        | Tbcd         |
| 1 | 27.74 | Double-strand break repair via break-induced replication                                | GO:0000727        | Cdc45        |
| 1 | 27.74 | Aminophospholipid transport                                                             | GO:0015917        | ATP11B       |
| 1 | 27.74 | <b>Synaptic target attraction</b>                                                       | <b>GO:0016200</b> | <b>Ten-a</b> |
| 1 | 27.74 | N-terminal peptidyl-methionine acetylation                                              | GO:0017196        | Naa60        |
| 1 | 27.74 | Peptidyl-lysine methylation                                                             | GO:0018022        | Eef1akmt2    |
| 1 | 27.74 | Negative regulation of ossification                                                     | GO:0030279        | LRP4         |
| 1 | 27.74 | Negative regulation of phosphoprotein phosphatase activity                              | GO:0032515        | Bod1         |
| 1 | 27.74 | Store-operated calcium entry                                                            | GO:0002115        | olf186-F     |
| 1 | 27.74 | Cytoplasmic sequestering of transcription factor                                        | GO:0042994        | Sufu         |
| 1 | 27.74 | Melanin biosynthetic process from tyrosine                                              | GO:0006583        | BMSK0009475  |
| 1 | 20.80 | Cytoplasmic mRNA processing body assembly                                               | GO:0033962        | pat11        |



|   |       |                                                                                    |                   |                         |
|---|-------|------------------------------------------------------------------------------------|-------------------|-------------------------|
| 1 | 20.80 | Positive regulation of transcription from RNA polymerase I promoter                | GO:0045943        | HEATR1                  |
| 1 | 20.80 | Negative regulation of insulin secretion                                           | GO:0046676        | HADH                    |
| 1 | 16.64 | Microtubule nucleation                                                             | GO:0007020        | TUBG1                   |
| 1 | 16.64 | <b>Eclosion rhythm</b>                                                             | <b>GO:0008062</b> | <b>disco</b>            |
| 1 | 16.64 | Late endosome to vacuole transport                                                 | GO:0045324        | chmp3                   |
| 1 | 16.64 | <b>Negative regulation of axon extension involved in axon guidance</b>             | <b>GO:0048843</b> | <b>tap</b>              |
| 1 | 16.64 | Glucose transmembrane transport                                                    | GO:1904659        | SLC2A3                  |
| 1 | 16.64 | Nucleocytoplasmic transport                                                        | GO:0006913        | Anp32a                  |
| 2 | 13.87 | Chromosome segregation                                                             | GO:0007059        | PPP2R1A,Naa60           |
| 1 | 13.87 | Nucleotide catabolic process                                                       | GO:0009166        | BMSK0009399             |
| 1 | 13.87 | Phosphatidylethanolamine biosynthetic process                                      | GO:0006646        | PCYT2                   |
| 2 | 12.80 | Negative regulation of sequence-specific DNA binding transcription factor activity | GO:0043433        | melt,Sufu               |
| 2 | 10.40 | Protein heterotetramerization                                                      | GO:0051290        | pyx,LRP4                |
| 2 | 9.25  | Phospholipid biosynthetic process                                                  | GO:0008654        | Mboat1,PCYT2            |
| 2 | 9.25  | <b>Locomotor rhythm</b>                                                            | <b>GO:0045475</b> | <b>Ork1,disco</b>       |
| 2 | 8.76  | Pupal chitin-based cuticle development                                             | GO:0008364        | Gld,Gld                 |
| 3 | 8.61  | Mitochondrial translation                                                          | GO:0032543        | BMSK0007759,MRPS35,gatA |
| 2 | 8.32  | Sperm storage                                                                      | GO:0046693        | Gld,Gld                 |
| 2 | 7.93  | Cytoplasmic translation                                                            | GO:0002181        | RpL4,                   |
| 2 | 7.93  | Synaptic growth at neuromuscular junction                                          | GO:0051124        | LRP4,Ten-a              |
| 2 | 7.56  | Negative regulation of canonical Wnt signaling pathway                             | GO:0090090        | PSMC6,LRP4              |
| 2 | 6.93  | <b>Mushroom body development</b>                                                   | <b>GO:0016319</b> | <b>tap,Src64B</b>       |
| 2 | 6.93  | Post-translational protein modification                                            | GO:0043687        | TULP4,PSMC6             |
| 2 | 6.93  | <b>Synapse organization</b>                                                        | <b>GO:0050808</b> | <b>Ten-a,LRP4</b>       |
| 2 | 5.74  | <b>Trehalose transport</b>                                                         | <b>GO:0015771</b> | <b>Tret1-1,Tret1-1</b>  |
| 2 | 5.20  | Positive regulation of canonical Wnt signaling pathway                             | GO:0090263        | PSMC6,trbd              |
| 3 | 5.09  | Cell migration                                                                     | GO:0016477        | trbd,Bear1,SPEF1        |
| 2 | 5.04  | Response to endoplasmic reticulum stress                                           | GO:0034976        | SEC16A,Pdi              |

|   |      |                                              |            |                   |
|---|------|----------------------------------------------|------------|-------------------|
| 3 | 4.62 | Mitotic cell cycle                           | GO:0000278 | TUBG1,Tbcd,polo   |
| 2 | 4.62 | Microtubule cytoskeleton organization        | GO:0000226 | TUBG1,Tbcd        |
| 3 | 3.37 | G-protein coupled receptor signaling pathway | GO:0007186 | Bcar1,Atrnl1,TRHR |

1160

1161 **Table 6:** Top significantly enriched GO terms for *D. rubicunda* night upregulation

1162

1163

1164

| Gene Symbol            | Gene Name                           | Function                              | DESe<br>q2 | EdgeR | WGC<br>NA | Flybase<br>ID | SILKD ID                      |
|------------------------|-------------------------------------|---------------------------------------|------------|-------|-----------|---------------|-------------------------------|
| BNC1/disco             | disconnected                        | vision                                | 1*         | 1*    |           | FBgn0000459   | BMSK0012241                   |
| Spt5                   | Spt5                                | transcription                         | 1*         | 1*    |           | FBgn0040273   | BMSK0011143                   |
| 1q/trbd                | trabid                              | development                           |            | 1     |           | FBgn0037734   | BMSK0015294                   |
| RpL4                   | Ribosomal protein L4                | energy use, Ribosomal production      | 1*         |       |           | FBgn0003279   | BMSK0006059                   |
| Prp2/PPO2              | Prophenoloxidase 2                  | Wound melanization                    | 1*         |       |           | FBgn0033367   | BMSK0009475                   |
| mRpS5                  | mitochondrial ribosomal proteins    | energy use, mitochondrial maintenance | 1*         |       |           | FBgn0287187   | BMSK0014662                   |
| SLC2A6/Tret1-1         | Solute Carrier Family 2 Member 6    | locomotion, energy metabolism         | 1*         |       |           | FBgn0050035   | BMSK0003817**,<br>BMSK0003818 |
| TUBG1/ $\gamma$ Tub23C | tubulin gamma 1                     | brain development in adult            | 1*         |       |           | FBgn0260639   | BMSK0002451                   |
| PARL/ $\rho$ -7        | presenilin associated rhomboid like | mitochondrial maintenance             | 1*         |       |           | FBgn0033672   | BMSK0008635                   |
| SLC17A5/MFS10          | Solute carrier family 17 member 5   | transmembrane ion transporter         | 1*         |       |           | FBgn0030452   | BMSK0001219                   |
| titin1/sls             | sallimus                            | locomotion                            | 1          |       |           | FBgn0086906   | BMSK0000202                   |
| unc-22/unc             | uncoordinated                       | adult locomotion, hearing             | 1          |       | 1         | FBgn0003950   | BMSK0015609**,<br>BMSK0000066 |
| ARHGAP17/RhoGAP92B     | rho GTPase-activating protein 17    | auditory, brain development           |            |       | 1         | FBgn0038747   | BMSK0009977                   |
| tk                     | tachykinin                          | locomotion and circadian rhythms      |            |       | 1         | FBgn0037976   | BMSK0003725                   |
| BmorOBP1/              | Odorant Binding                     | odor binding                          |            |       | 1         | FBgn0034768   | BMSK0013390                   |

|                 |                                    |              |  |  |   |                         |
|-----------------|------------------------------------|--------------|--|--|---|-------------------------|
| Obp58a          | Protein 1                          |              |  |  |   |                         |
| PPAP2A/wun      | Inorganic Pyrophosphatase 2/wunnen | vision       |  |  | 1 | FBgn0016078 BMSK0011305 |
| BmorOBP2/Obp84a | Odorant Binding Protein 2          | odor binding |  |  | 1 | FBgn0011282 BMSK0009610 |
| takt/JHBP       | takeout-like                       | circadian    |  |  | 1 | FBgn0038395 BMSK0013046 |

1165

1166 **Table 7:** Gene symbol from EggNog or *B. mori* annotation. Gene names, function and closest  
 1167 flybase ID orthologs used to collect evidence for the various listed functions.\* Indicated that the  
 1168 gene altered direction or trend of expression across a diel pair. \*\* Indicates this ortholog was  
 1169 used for structural modeling and conservation analyses. This list is only a subset of the genes  
 1170 recovered from various analyses. The genes were chosen because they had either 1) multiple  
 1171 lines of evidence, robust divergent expression pattern, or 2) a gene ontology term for sensory or  
 1172 circadian function among three datasets. For exhaustive lists, see Supplementary Data

1173

| Process | Search Query                                                                                                                  | Excluding                                                                                                                                                             |
|---------|-------------------------------------------------------------------------------------------------------------------------------|-----------------------------------------------------------------------------------------------------------------------------------------------------------------------|
| Vision  | "vision" or "eye" or "visual" or "compound eye" or "visual perception" or "light" or "ocellus" or "visual" or "photoreceptor" | - "chain" -<br>"immunoglobulin" -<br>"light harvesting" -<br>"photosynthesis" -<br>"plastid" -"plant" -actin<br>-myosin -photoperiod -<br>touch -smell -"light chain" |
| Smell   | "olfaction" or "smell" or "antennal" or "olfactory" or "odor" or "pheromone"                                                  |                                                                                                                                                                       |
| Hearing | "audition" or "hearing" or "sound" or "auditory" or "tympanum" or "ear"                                                       |                                                                                                                                                                       |

|           |                                                                                       |                                                                      |
|-----------|---------------------------------------------------------------------------------------|----------------------------------------------------------------------|
| Circadian | "circadian" or "rhythm" or "clock" or<br>"diurnal" or "nocturnal" or<br>"entrainment" |                                                                      |
| Behaviour | "locomotion" or "flight" or<br>"behavioral"                                           | - "cell" -<br>"morphogenesis" -<br>"development" or -<br>"pheromone" |
| Brain     | "neural plasticity" or "brain" or<br>"neuropeptide"                                   |                                                                      |

---

1174 **Table 8:** GO query terms for functional lookup

1175

1176

1177
